1 **Inferring species compositions of complex fungal communities from long- and short-read**  
2 **sequence data**

3 **Yiheng Hu<sup>1\*†</sup>, Laszlo Irinyi<sup>2,3,4</sup>, Minh Thuy Vi Hoang<sup>2,3,4</sup>, Tavish Eenjes<sup>1</sup>, Abigail Graetz<sup>1</sup>, Eric**  
4 **Stone<sup>1,5</sup>, Wieland Meyer<sup>2,3,4,6</sup>, Benjamin Schwessinger<sup>1\*</sup>, John P. Rathjen<sup>1\*</sup>**

5 <sup>1</sup> Research School of Biology, Australian National University, Canberra, ACT, Australia

6 <sup>2</sup> Molecular Mycology Research Laboratory, Centre for Infectious Diseases and Microbiology, Faculty  
7 of Medicine and Health, Sydney Medical School, Westmead Clinical School, The University of Sydney,  
8 Sydney, NSW, Australia.

9 <sup>3</sup> Marie Bashir Institute for Infectious Diseases and Biosecurity, The University of Sydney, Sydney,  
10 NSW, Australia.

11 <sup>4</sup> Westmead Institute for Medical Research, Westmead, NSW Australia.

12 <sup>5</sup> ANU-CSIRO Centre for Genomics, Metabolomics and Bioinformatics, Canberra, ACT, Australia

13 <sup>6</sup> Westmead Hospital (Research and Education Network), Westmead, NSW, Australia.

14

15 \* Correspondence: [yiheng.hu@anu.edu.au](mailto:yiheng.hu@anu.edu.au); [benjamin.schwessinger@anu.edu.au](mailto:benjamin.schwessinger@anu.edu.au);  
16 [john.rathjen@anu.edu.au](mailto:john.rathjen@anu.edu.au)

17 † Present address: Department of Microbial Interactions, IMIT/ZMBP, University of Tübingen,  
18 Tübingen, Germany

19

20

21

## 22 **Abstract**

### 23 Background:

24 The kingdom fungi is crucial for life on earth and is highly diverse. Yet fungi are challenging to  
25 characterize. They can be difficult to culture and may be morphologically indistinct in culture.  
26 They can have complex genomes of over 1 Gb in size and are still underrepresented in whole  
27 genome sequence databases. Overall their description and analysis lags far behind other  
28 microbes such as bacteria. At the same time, classification of species via high throughput  
29 sequencing without prior purification is increasingly becoming the norm for pathogen  
30 detection, microbiome studies, and environmental monitoring. However, standardized  
31 procedures for characterizing unknown fungi from complex sequencing data have not yet  
32 been established.

### 33 Results:

34 We compared different metagenomics sequencing and analysis strategies for the  
35 identification of fungal species. Using two fungal mock communities of 44 phylogenetically  
36 diverse species, we compared species classification and community composition analysis  
37 pipelines using shotgun metagenomics and amplicon sequencing data generated from both  
38 short and long read sequencing technologies. We show that regardless of the sequencing  
39 methodology used, the highest accuracy of species identification was achieved by sequence  
40 alignment against a fungi-specific database. During the assessment of classification  
41 algorithms, we found that applying cut-offs to the query coverage of each read or contig  
42 significantly improved the classification accuracy and community composition analysis  
43 without significant data loss.

44 Conclusion:

45 Overall, our study expands the toolkit for identifying fungi by improving sequence-based  
46 fungal classification, and provides a practical guide for the design of metagenomics analyses.

47

## 48 **Introduction**

49 Fungi are ubiquitous yet their presence and impact are often overlooked. It has been  
50 estimated that 2.2-3.8 million species inhabit planet earth [1] but only about 4% of these are  
51 catalogued [2]. Mora *et al.* estimated that there are 7.8 million and 298,0000 animal and  
52 plants species on earth with 12.3% and 72.4% of these characterised scientifically,  
53 respectively [3], which points towards a more central role in cultural awareness. In contrast,  
54 fungi are introduced to our consciousness via a brief mention in high school textbooks, or as  
55 largely side subjects in botany and microbiology courses at university [4,5]. Fungi play diverse  
56 roles throughout evolution and are particularly active in mediating the breakdown and uptake  
57 of nutrients. They constitute a major disease load to humans, causing millions of deaths per  
58 year, and wreak devastating crop losses via a constant toll of disease and epidemics and are  
59 an existential threat to many frog species [6,7]. On the other hand, fungi are or are used to  
60 manufacture delicious foods and beverages, and have saved countless lives via antibiotic  
61 production [8,9]. Therefore, a recent call was made to expand fungal research and improve  
62 our awareness of this special kingdom [10].

63 To progress our understanding of fungal biology we need to be able to classify more species  
64 more precisely. Fungi have been an independent kingdom since 1969 [11] with addition of  
65 further phyla in early 2000 [12–16]. Historically, its taxonomy was based on morphological

66 and reproductive traits but this has been surpassed by DNA-based classification which  
67 revolutionized mycology, not only refining the conventional taxonomic tree [17,18] but also  
68 standardizing the identification of new species. In the absence of whole genome data, DNA-  
69 based classification primarily exploits the internal transcribed spacer (ITS) within the  
70 ribosomal RNA genes as a highly polymorphic marker to distinguish species. It is easily  
71 amplified and sequenced due to highly conserved flanking sequences and contains a high  
72 degree of variation between even closely related species. Although a mature pipeline  
73 comprising ITS amplification, Illumina sequencing and data analysis has been established[19],  
74 several studies reported biases from the sequencing technology used and from unevenly  
75 amplified fungal marker regions [20–22]. Recently, novel strategies exploiting long-range  
76 amplification and long-read sequencing have been developed to improve these classifications  
77 [23,24]. In addition, whole genome shotgun sequencing and rapidly expanding genome  
78 databases allow mapping of newly generated DNA sequences directly to the database. This  
79 strategy allows exploitation of genetic variation throughout the genome and abandonment  
80 of the marker gene amplification step, which increases classification accuracy and reduces  
81 the biases from the estimation of relative abundance [25].

82 Although advanced sequencing methods allow novel strategies for fungal identification  
83 particularly from mixed samples, new demands are placed on data analysis pipelines to  
84 improve the accuracy of fungal classification. Different algorithms have been developed to  
85 classify DNA sequences at distinct taxonomic ranks based on sequence databases with  
86 taxonomic information [26–30]. For example, alignment algorithms such as Basic Local  
87 Alignment Search Tool (BLAST) [27] detect matches of each sequence to subjects of the target  
88 database along with the taxonomic information assigned to each entry. Alternatively,  
89 sequence features represented by short unique subsequences named k-mers can be derived

90 from sequence data and mapped to databases to identify taxa with the highest number of  
91 cross-mapping k-mers[28]. Several studies have critically assessed algorithms for species  
92 classification on simulated datasets or bacterial community datasets [31–33], but  
93 comparisons of sequencing strategies for complex fungal communities alignment using real  
94 data and different identification pipelines are extremely rare. In addition to search algorithms,  
95 the choice of database also influences classifications dramatically, but only a few studies have  
96 researched their impact [34–36]. Therefore, more comprehensive benchmarking of both  
97 classification algorithms and databases are needed to optimise identification pipelines.

98 Here, we assessed different combinations of algorithms and databases during processing of  
99 both short- and long-read sequencing data for the identification of taxa from complex mock  
100 fungal communities. We identified key factors that influence the accuracy of classifications,  
101 both for mock community datasets and public datasets. Optimisation of these methods also  
102 lead to more accurate community composition analysis. Our results provide guidelines for the  
103 design of sequence-based community analysis for fungal species.

104

## 105 **Results**

### 106 **Construction of mock fungal community datasets**

107 We constructed two mock communities from the same set of 44 fungal species  
108 (Supplementary Table S1). Most of these are human-associated pathogenic yeasts while some  
109 are basidiomycete pathogens. One community comprised pooled DNA (PD) from each species  
110 and the second was composed of DNA extracted from equal quantities of fungal biomass (PB)  
111 of each species that were mixed together prior to extraction. We generated four sequence

112 datasets for each community using Illumina and nanopore technologies, sequencing both  
113 shotgun metagenomes and targeted amplicons respectively. The data derived from each  
114 strategy are summarized in Table 1.

115

116 **Alignment algorithm against a specific fungal database resulted in the most accurate fungal**  
117 **classifications**

118 We compared different analysis strategies for each shotgun dataset. For nanopore datasets,  
119 we directly used the quality-controlled reads for classification. For Illumina data, we quality  
120 filtered all reads and assembled them into contigs before classification to maximize the  
121 classification accuracy. We performed both alignment and k-mer based classifications on  
122 these data using BLAST and Kraken2 [27,29] using a ‘winner-takes-all’ strategy in which the  
123 top hit was taken as the identity of the query sequence. For each algorithm, we compared the  
124 use of two reference databases: the non-redundant NCBI nucleotide database (nt) [37] and  
125 the RefSeq fungi database (RFD) [38] which only contains curated fungal genomes. We first  
126 assessed the performance of each alignment tool on both databases for each data input. We  
127 compared the concordance in the results of each pipeline at the genus level. We define  
128 concordance as the percentage of fungal genera identified by both analyses in a pairwise  
129 comparison (Figure 1A). The concordance between analyses on each dataset varied between  
130 69% and 86% and generally, Illumina data resulted in higher concordance than did nanopore  
131 data.

132 We then aimed to identify the combination of algorithm and database that yielded the most  
133 accurate species identification. We used classified proportion and precision to evaluate each

134 classification, where  $\text{Classified Proportion} = \frac{\# \text{ total basepairs classified.}}{\# \text{ total basepairs of input reads}}$ , and

135  $\text{Precision} = \frac{\# \text{ total basepairs classified correctly}}{\# \text{ total basepairs classified}}$ .

136 The number of total basepairs is calculated as total read length for nanopore reads and total  
137 coverage of Illumina reads to each contig [32,33]. We plotted the precision and classified  
138 proportion for each pipeline and found three regular patterns (Figures 1B and 1C): First, for  
139 each dataset, BLAST resulted in higher precision but lower classification proportion by  
140 comparison to Kraken2. Second, Illumina contigs returned higher classification proportion  
141 and precision than nanopore reads. Third, classification against the RFD database yielded  
142 higher precision than those against the nt database. In summary, BLAST alignments against  
143 the RFD database yielded the best classification strategy.

144

#### 145 **Applying cut-offs to query coverage improves classification accuracy on shotgun** 146 **metagenomics datasets**

147 We next aimed to improve our classification scheme by filtering the BLAST search results. We  
148 reasoned that restricting alignment metrics would reduce the number of false classifications.  
149 To investigate changes in classification accuracy after restricting BLAST output parameters,  
150 we first BLASTed shotgun metagenomics reads against the RFD database without applying  
151 any filter, then applied progressive cut-offs on different parameters of the BLAST results. We  
152 evaluated changes in the results based on the metrics precision, remaining rate and  
153 completeness. Precision is described above and estimates the accuracy of the classification;  
154 remaining rate captures the percentage of the input data remaining after the application of  
155 each cut-off; and completeness is the number of taxa captured relative to the total number  
156 of taxa within the mock community. We initially applied cut-offs on query length and two

157 alignment metrics; E-value - the number of expected hits of similar quality that could be found  
158 by chance alone; and pident – the percentage of identical matches within the region of  
159 alignment between query and subject. As shown in Figure 2A, applying progressive cut-offs  
160 to query length did not improve the precision, whilst both completeness and remaining rate  
161 diminished dramatically from very small cut-off values. Cut-offs applied to alignment E-values  
162 removed <20% of the BLAST results, whereas precision showed minor improvement,  
163 especially on nanopore datasets (Figure 2B). For Illumina data, applying cut-offs to the E-value  
164 increased the precision by around 2% but at the cost of diminished completeness. E-value  
165 cut-offs performed better on nanopore datasets, improving precision by 3% (PD) or 4% (PB)  
166 with non-identification of only a single genus from the mock community, at  $10^{-250}$  or almost  
167  $10^{-400}$  respectively. Progressive cut-offs on pident yielded the best results of all three filters.  
168 For Illumina data, precision was improved by up to 8% for PB data, and completeness  
169 remained at 100% in almost all cases (Figure 2C). For nanopore datasets, pident cut-offs  
170 improved the precision by up to ~3% before sharp decreases, with a concurrent filtering of  
171 ~60% BLAST result as shown by the remaining rate. Given the characteristically high error rate  
172 of nanopore reads, we also applied cut-offs on quality scores to these data. Cut-offs applied  
173 to Phred scores did not alter the precision, while a significant proportion of the dataset was  
174 lost through filtering (Supplementary Figure S1). Overall, our results suggest that applying  
175 each filter to BLAST results performs well on either Illumina or nanopore data but not both,  
176 and that cut-offs based on query length or quality scores did not affect the precision  
177 significantly.

178 Given the results above, we investigated how the alignment parameters were calculated and  
179 explored other variables to improve the classifications. The BLAST E-value is calculated as  $E =$   
180  $mn2^{-S}$  in which S is the bits score derived from the number of gaps and mismatches in the



181 alignment, and  $m$  and  $n$  are the query length and database total length respectively [39].  
182 Therefore, the E-value is influenced exponentially by the alignment quality. We next  
183 investigated query coverage, a metric based on how much of the query sequence aligned to  
184 the subject. We calculated the query coverage as the number of identical matches divided by  
185 the read or contig length, and applied progressive cut-offs on this parameter for each  
186 dataset/algorithm analysis. As shown in Figure 2D, applying cut-offs on query coverage  
187 improved the precision of all four analyses significantly, and did not cause losses of  
188 completeness at smaller cut-off values. For example, at a 10% cut-off on query coverage, the  
189 precision of all four analyses was 98-99% while the completeness remained at 100% and the  
190 removed BLAST results ranged from 10-25%. This result not only supported our hypothesis  
191 that the total length of the alignment matters as much as the alignment quality, but also  
192 suggested a novel approach to improve the accuracy of fungal classification.

193

#### 194 **Improving taxa identification from published metagenomics datasets using query coverage** 195 **as a filtering parameter**

196 After improving classifications by applying cut-offs to the query coverage on the mock  
197 community datasets, we extended this strategy to try to improve the classification of  
198 published shotgun metagenomics datasets. We re-analysed ten nanopore and six Illumina  
199 shotgun metagenomics datasets [40–43]. These included host-associated fungal samples  
200 (nanopore) and host-depleted microbiome data (Illumina). Since the environmental datasets  
201 contain unknown species, we followed the concept of classification precision. We calculated  
202 the percentage of the dataset that was classified into taxa known to be included in the sample.  
203 For example, in re-analysing human clinical samples [42], we included the pathogen

204 (*Pneumocystis*) and the host human (*Homo*) as the true taxa, and calculated the total  
205 proportion of query sequences classified to these taxa before and after applying cut-offs on  
206 query coverage. Table 2 shows the improvement in taxonomic classification from the  
207 published datasets after applying query coverage cut-offs. We initially applied a 20% cut-off  
208 on the query coverage for all analyses, but the data loss in most cases was too high. Therefore,  
209 we applied query cut-offs that filtered around 20% of the blast result based on our results  
210 from the mock fungal community datasets (Figure 2D).

211 For all Illumina datasets, we downloaded the quality-controlled sequences and re-analysed  
212 them using the assembly and BLAST pipeline described above against the NCBI nt database.  
213 For the nanopore human datasets [42], we used the BLAST results taken directly from the  
214 original articles for analysis. For the infected wheat datasets [41], we downloaded the  
215 sequences and re-analysed them against the RefSeq fungal database. The precision increased  
216 for nearly all datasets after applying query coverage cut-offs (Table 2). For the Illumina  
217 microbiome datasets, we first assessed the change of proportions in fungal taxa after applying  
218 cut-offs on query coverages using the species lists identified by Donovan *et al.* [44] as  
219 confirmed taxa. We observed only marginal increase in percentages for the confirmed fungal  
220 communities, due to their low total proportions in the original samples. We then calculated  
221 the improvement in precision for the bacterial communities. The Illumina datasets were  
222 generated from swine and mouse gut microbiome samples, so we assessed the change in  
223 proportions of their core bacterial genera (a group of bacteria commonly present in swine  
224 and mouse guts [45,46]). The percentages of confirmed core bacterial genera improved by up  
225 to 5.7% after applying cut-offs on query coverage (Table 2). In addition, in the nanopore  
226 human datasets, the total percentage of reads classified as *Homo* in the three healthy  
227 individual samples were improved by applying cut-offs to query coverage. These results

228 indicated that this strategy may be broadly applicable not only to fungal species, but also to  
229 the classification of other eukaryotes and bacteria. One Illumina dataset (d1) and one  
230 nanopore dataset (a5) showed decreased percentages of confirmed taxa after applying query  
231 coverage cut-offs, which might be because the core microbiome species are not representing  
232 the species identified in the Illumina sample, or due to the low coverage and high error rate  
233 of nanopore data.

234

### 235 **Benchmarking classification pipelines for amplicon datasets identified advantages of each** 236 **strategy**

237 We next assessed different strategies for the classification of ITS amplicon datasets. We  
238 amplified the ITS region from both mock communities using two different primer pairs and  
239 three technical replicates for each sample. Taking advantage of nanopore technology, we  
240 performed long-amplicon sequencing of a roughly 3 kb ribosomal RNA gene region covering  
241 part of the 28S subunit, ITS1, 5.8S subunit, ITS2 and part of the 18S subunit [19]. For Illumina  
242 sequencing we used the well-established ITS1F-ITS2 amplicon of about 300 bp in length [47].  
243 Similar to the analysis of the shotgun datasets, we applied both k-mer and alignment-based  
244 approaches to the classification of nanopore amplicon data. We used the pair-wise alignment  
245 algorithm minimap2 as the alignment algorithm instead of BLAST due to its speed and  
246 efficiency. We tested four different databases for classification of long amplicons; the NCBI  
247 18S and 28S databases, and two ITS databases from NCBI and UNITE, respectively [38,48].  
248 Overall, we found that the k-mer algorithm returned much higher classification proportion  
249 than alignment for each nanopore dataset, but the highest precision (~97%) were achieved  
250 by combining the minimap2 alignment algorithm with the NCBI ITS database (Figure 3A). For

251 Illumina amplicon datasets, we applied the QIIME2 pipeline which is one of the most widely  
252 used strategies for ITS classification and community composition analysis[49]. The QIIME2  
253 pipeline groups similar Illumina amplicons into sequence features before classification to  
254 reduce the demand on computational resources [50]. Since all individual Illumina reads are  
255 grouped into sequence features and all the sequence features are classified, the classification  
256 proportion of the Illumina amplicon datasets are 100%. We plotted precision rates from the  
257 QIIME2 analysis of both the PD and PB samples with their means (Figure 3B). The mean  
258 precision from either Illumina dataset were lower than that from k-mer analysis of the  
259 respective nanopore datasets.

260 Although the precision from the amplicon datasets were higher than that from shotgun  
261 datasets, the ITS classification did not identify all genera within the mock community, as  
262 shown by our completeness analysis (Figure 3C). The nanopore amplicons identified 68% (PD)  
263 and 63% (PB) of the total genera in the mock community, whereas the Illumina amplicon  
264 datasets covered only 25% and 41% of the genera respectively. We suspect that the low  
265 completeness from ITS classifications was due partially to the low quality of this particular  
266 dataset (Table 1) and partially due to non-uniform amplification from the different primer  
267 pairs. However, there were fewer nanopore amplicon reads than in the Illumina amplicon  
268 datasets and the completeness from the nanopore data was higher (Figure 3C). This supports  
269 the argument that long amplicons identify a wider range of species and are more accurate in  
270 species classification than short amplicons [51,52].

271

272 **Cut-offs on query coverage also improve community composition analysis**

273 We next analysed community compositions using the most accurate classification method for  
274 each dataset. Community composition refers to the identity and relative abundances of all  
275 taxa in a community. Given the observation that use of a restricted database resulted in  
276 higher classification precision, we constructed a database containing only the genomes from  
277 species within the mock community and aligned all of the data to the mock community  
278 database using BLAST. This forces the precision to 100% as any classification will belong to a  
279 species from the mock community. We then BLASTed each dataset against this database and  
280 calculated the relative abundance of each genus. We defined this as the ‘gold standard’ for  
281 community composition analysis of the mock fungal community (Figure 4A). We then  
282 compared the community composition determined from each combination of algorithms and  
283 databases with the gold standard for each dataset, and measured their differences using  
284 three statistical distance tests: Bhattacharyya distance, relative Euclidean distance and  
285 relative entropy [53–55]. Consistently, BLASTing sequences against the RFD database  
286 produced community compositions with the highest similarity to the gold standard analysis  
287 (Figure 4B).

288 To assess whether query coverage cut-offs also improved the community composition  
289 analysis of shotgun metagenomics data, we plotted the changes in statistical distance after  
290 progressive application of query coverage cut-offs (Figure 4). After applying cut-offs on the  
291 query coverage, the community composition improved in all cases especially for lower cut-off  
292 values. The community compositions from PB-Illumina datasets improved and turned out to  
293 be the most similar to the gold standard at query-coverage cut-offs greater than 3 - 4%, which  
294 is consistent with the changes in precision rate shown in Figure 2D. Overall, our results  
295 illustrated that applying cut-offs on query coverage did not only improve the classification  
296 accuracy, but also the community composition analysis.

297

298 **Discussion:**

299 Here we investigated the taxonomic classification from sequencing data, one of the key steps  
300 in all metagenomic workflows, with a particular focus on fungi. After assessing various  
301 combinations of algorithms and databases following different sequencing strategies, we  
302 found that the combination of BLAST with the specific RFD database always resulted in the  
303 most precise classification for all mock fungal community datasets. These classifications were  
304 further improved when applying cut-offs on query coverage including positive flow on effects  
305 on downstream community composition analysis from shotgun metagenomics datasets.

306 Despite that sampling and DNA extraction substantially influence the outcome of species  
307 classifications [56–58], choosing an appropriate sequencing strategy is the primary step  
308 towards accurately profiling a sample. For shotgun datasets, our results suggested that both  
309 short and long shotgun datasets have comparable accuracy and both higher than the  
310 amplicon datasets. However, Illumina shotgun datasets require additional steps to assemble  
311 reads into contigs before querying them against a database, and to map all reads back to the  
312 assembly to quantify the coverage. These processes are necessary to achieve accurate  
313 classification from longer contigs [59], but result in a longer sequence-to-result turnover than  
314 the long read shotgun data. In the analysis of the amplicon data, long range amplicons  
315 performs better in the classification accuracy and completeness compare to the short ITS data,  
316 consistent with other studies [51,52]. Comparing to the results from shotgun datasets, the  
317 overall completeness from the result of amplicon datasets is much lower. We think that is  
318 because we used much less amplicon data for benchmarking classification pipelines, and the

319 incomplete database which do not contain all taxa present in our mock community. Overall,  
320 the long read shotgun datasets returned the most accurate fungal classification.

321 Next, our data supported that alignment algorithm (BLAST) outperform the k-mer based  
322 approach (kraken2) in the accuracy of classification [32,60], and also compared progressive  
323 cut-offs to major alignment parameters for shotgun metagenomics data. We found that  
324 applying read length or read quality cut-offs did not improve the precision of the classification  
325 for all shotgun datasets. This observation is different with the previous study based on  
326 simulated data, which claimed that the long reads improves the accuracy of classification [60].  
327 Cut-offs on pident slightly improved the classification accuracy for illumina datasets, but the  
328 error-prone nature of the nanopore data (~10% error rate) is also reflected in the result, as it  
329 causes the breakdown of precision when pident cut-offs reach 90% (Figure 2C).

330 We found that query coverage cut-off that filter out 20% blast result worked best. Unlike the  
331 E-value weighing the gaps and mismatch as the major factor effecting alignment quality, the  
332 query coverage weighs the query length as well as the number of identical matches in the  
333 assessment of the alignment quality. In this case, we can eliminate more spurious alignments  
334 that are due to a small proportion of reads with high fidelity to the reference, which are  
335 commonly found in reads containing conserved genes and repeated sequences. Interestingly,  
336 to reach the same 20% filtering threshold, we set up higher cut-offs on the query coverage  
337 (10 -20%) in mock community datasets than the real environmental datasets, including few  
338 extremely low thresholds of query coverage in the Illumina shotgun datasets. We compared  
339 other studies that use simulated data to generate metagenomics contigs for classification,  
340 and found that they used 90% query coverage cut-offs as the parameter[62–64]. Together  
341 with the different result of read length and read quality cut-offs, this observations highlighted

342 the difference between the use of real environmental data and the simulated data in  
343 benchmarking studies, especially for the classification of complex microbial communities.

344 PD and PB samples showed slightly different results in comparing statistical distance with the  
345 gold standard. After applying cut-offs on query coverage, both Bhattacharyya distance and  
346 Euclidean distance between the best practice and the gold standard classification only  
347 showed marginal decrease in PD samples, and slowly reversed as the cut-offs increase. We  
348 think that is because about 1/3 of reads were classified as *Candida* in the pooled DNA sample,  
349 so the difference on the relative abundance of one *Candida* genus between the gold standard  
350 community composition and the best practice is much higher and much more influential to  
351 the final distance than that from other genera.

352 Following the importance of the alignment quantity represented by the query coverage, the  
353 next question is, how to bring the low quality but high quantity alignment into consideration?  
354 Therefore, the winner-takes-all selection strategy itself can be re-designed, as the highly  
355 conserved genome regions from different species generate highly close alignment scores  
356 between the best alignment and other top alignments. In this case, a weighing statistics and  
357 the relative probability for multiple top taxonomic assignments can be explored and  
358 introduced to replace the best-hit-takes-all strategy. This will be particularly useful in  
359 connection with the rapid expansion of the fungal genome databases.

360 Next to the right classification tool, chosen the appropriate database significantly influences  
361 analysis outcomes [33,34]. Based on our observation, we suggest that 'prior knowledge'  
362 about the dataset should guide the choice of the appropriate database as this will improve  
363 the accuracy of taxonomic classifications. For example, our results suggested that the  
364 restricted database resulted in more accurate fungal classifications for shotgun



365 metagenomics datasets. This strategy might be appropriate if queries are initial binned into  
366 kingdoms before a more in-depth analysis with kingdom specific databases. Also, Kaehler *et*  
367 *al.* [65] incorporated environment-specific taxonomic abundance information into the  
368 analysis of amplicon datasets and showed that these improve classification accuracy. Similar  
369 approaches can be applied to metagenomic datasets. In addition, machine learning strategies  
370 become increasingly popular for analysing genomic data. Here taxonomic classifiers could be  
371 trained on existing labelled sequence datasets before being applied to communities with  
372 similar composition to the training datasets or to identify target species from complex  
373 communities [60,66].

374

## 375 **Conclusion**

376 In this study, we perform an in-depth analysis on how different sequencing strategies,  
377 classification algorithms and databases impact fungal classifications using complex real-life  
378 mock community sequencing datasets. We find that alignment algorithm (BLAST) with  
379 targeted fungal database (RFD) achieve the best classification accuracy and community  
380 composition estimates. These can be further improved by applying cut-offs on query coverage.  
381 Taken together, the findings from our benchmarking workflows have important implications  
382 for mycology studies for multiple stages of metagenomics analysis, and provided a guide to  
383 other researchers aiming to study fungal metagenomics.

384

## 385 **Methods**

## 386 **Code availability**

387 All detailed commands and scripts used in each step were summarized in  
388 [https://github.com/Yiheng323/Benchmarking-taxonomic-classification-strategies-using-](https://github.com/Yiheng323/Benchmarking-taxonomic-classification-strategies-using-mock-fungal-communities)  
389 [mock-fungal-communities.](https://github.com/Yiheng323/Benchmarking-taxonomic-classification-strategies-using-mock-fungal-communities)

### 390 **Fungal harvesting, DNA extraction and construction of mock communities**

391 Selected fungal strains were cultured onto Sabouraud dextrose agar and incubated for 48  
392 hours at 27°C.

393 For the species in the PD community, an inoculating loop full of fungal cells were scraped into  
394 a 1.5 mL microfuge tube and crushed with a pestle and liquid nitrogen. Genomic DNA was  
395 then extracted using the Zymo Research *Quick*-DNA Fungal/Bacterial Miniprep Kit (cat. no.  
396 D6005 Zymo Research, Irvine, CA, USA). First, BashingBead™ Buffer was added to the crushed  
397 fungal cells and vortexed. The mixture was then filtered through a Zymo-Spin™ III-F Column  
398 and the filtrate was combined with Genomic Lysis Buffer. The mixture was filtered through a  
399 Zymo-Spin™ IICR Column and washed with DNA Pre-Wash buffer and g-DNA Wash Buffer.  
400 The DNA was eluted in nuclease free water. DNA concentration was measured using the  
401 DeNovix dsDNA Broad Range Kit (DeNovix, Wilmington, DE, USA) and 250 ng of DNA from  
402 each strain were then pooled together.

403 For the PB community, two inoculating loops of fungi of each species in teg mock community  
404 were scraped into a ceramic mortar. Liquid nitrogen was then poured into the mortar and the  
405 fungal mixture was crushed into a fine powder. DNA was then extracted using the Qiagen  
406 DNeasy PowerMax Soil Kit (cat. no. 12988-10 Qiagen, Hilden, Germany). PowerBead Solution  
407 and Solution C1 were added to the crushed fungal community, vortexed and centrifuged. The  
408 supernatant was then added to Solution C2, mixed and centrifuged, which was then repeated  
409 with Solution C3. The resulting supernatant was combined with Solution C4 and centrifuged

410 through a column. The column was then washed twice with Solution C5. Final DNA was eluted  
411 in nuclease free water and the concentration measured using the DeNovix dsDNA Broad  
412 Range Kit.

### 413 **Library preparation and sequencing**

414 The ITS1 regions of the rRNA gene were amplified with the universal fungal primers, ITS1F  
415 (CTTGGTCATTTAGAGGAAGTAA) and ITS2 (GCTGCGTTCTTCATCGATGC)[47]. Sequencing of  
416 PCR amplicons was conducted with MiSeq® System of Illumina (Illumina, San Diego, CA, USA)  
417 by the Australian Genome Research Facility. The Illumina bcl2fastq 2.18.0.12 pipeline was  
418 used to generate the sequence data. Pair-ends reads 2 × 300bp were generated up to 0.15  
419 GB per sample for amplicon data. The Illumina amplicon data are then directly imported into  
420 QIIME2 for analysis. For shotgun Illumina datasets, we employed the same sequencing  
421 pipeline as the amplicon data, with MiSeq® and bcl2fastq 2.18.0.12 pipeline for the 2 x 300bp  
422 paired end reads. Raw shotgun Illumina reads were trimmed adapters with Trimomatic [67].  
423 Quality controlled, paired end reads were merged and assembled to metagenomics contigs  
424 using IDBA\_UD [68], which is more suitable for datasets with uneven sequencing depths of  
425 each species. After assembly, raw reads were mapped back to the contigs using bwa-mem  
426 [69], and the bam files were generated and sorted from sam files using samtools [70].  
427 Bedtools [71] was used for generating coverage for each contig, and we used python numpy  
428 and pandas module to calculate the average coverage for each contig.

429 For Nanopore sequencing of both shotgun and amplicon sequencing, we used Ligation  
430 Sequencing 1D SQK-LSK108 and Native Barcoding Expansion (PCR-free) EXP-NBD103 Kits from  
431 ONT (UK), as adapted by Hu and Schwessinger [72], which was adapted from the  
432 manufacturer's instructions with the omission of DNA fragmentation and DNA repair. DNA

433 was first cleaned up using a 1× volume of Agencourt AMPure XP beads (cat. no. A63881,  
434 Beckman Coulter, Indianapolis, IN, USA) following manufacturer's instructions. We then  
435 eluted the beads binded DNA in 51 µl nuclease free water and quantified using NanoDrop®  
436 and Quibit™ Fluorometer (Thermo Fisher Scientific, Waltham, MA, USA). DNA was end-  
437 repaired (NEBNext Ultra II End-Repair/dA-tailing Module, cat. No. E7546), 1x volume beads  
438 cleaned (AMPure XP beads) and eluted in 31 µl nuclease free water. Barcoding reaction was  
439 performed by adding 2 µl of each native barcode and 20 µl NEB Blunt/TA Master Mix (cat. No.  
440 M0367) into 18 µl DNA, mixing gently and incubating at room temperature for 10 minutes. A  
441 1× volume (40 µl) Agencourt AMPure XP clean-up was then performed and the DNA was  
442 eluted in 15 µl nuclease free water. Ligation was then performed by adding 20 µl Barcode  
443 Adapter Mix (EXP-NBD103 Native Barcoding Expansion Kit, ONT, UK), 20 µl NEBNext Quick  
444 Ligation Reaction Buffer, and Quick T4 DNA Ligase (cat. No. E6056) to the 50 µl pooled  
445 equimolar barcoded DNA, mixing gently and incubating at room temperature for 10 minutes.  
446 The adapter-ligated DNA was cleaned-up by adding a 0.4× volume (40 µl) of Agencourt  
447 AMPure XP beads, incubating for 5 minutes at room temperature and resuspending the pellet  
448 twice in 140 µl ABB provided in the SQK-LSK108 kit. The purified-ligated DNA was  
449 resuspended by adding 15 µl ELB provided in the SQK-LSK108 kit and resuspending the beads.  
450 The beads were pelleted again and the supernatant sequencing library was transferred to a  
451 new 0.5 ml DNA LoBind tube (Eppendorf, Germany). Nanopore sequencing was carried out  
452 by MinION MK1b device using R9.4.1 Flowcells. Raw fast5 files are barcode demultiplexed by  
453 deepbiner (ONT), then basecalled by Guppy (v3.6.0, ONT, UK). Quality passed reads in fastq  
454 files were trimmed adapters and barcodes using qcat (ONT, UK). For the long amplicon data,  
455 we filtered out reads less than 2000 base pairs. All sequencing data was submitted to NCBI  
456 Short Read Archive (SRA) under the bioproject PRJNA725368 including eight accessions:

457 SRX10705648, SRX10705649, SRX10705650, SRX10705651, SRX10705695, SRX10705696 and  
458 SRX10705697.

#### 459 **Genome assembly**

460 While generating the reference genome database, we found that there were no reference  
461 genomes for *Candida rugosa*, *Candida mesorugosa* and *Cryptococcus magnus*, so we  
462 performed nanopore sequencing on pure DNA from each species and assembled their draft  
463 genomes. These assemblies were of sufficient contiguity and quality (Supplementary Table  
464 S2), so we added the new draft genomes into the reference database.

465 The nanopore data of *Candida rugosa*, *Candida mesorugosa* and *Cryptococcus magnus* was  
466 generated individually using Ligation Sequencing 1D SQK-LSK108 kit alone, and from  
467 independent flowcells. Data from each flowcell was basecalled and quality filtered using the  
468 same pipeline as described above. We got roughly 40X coverage for *Candida rugosa* and  
469 *Candida mesorugosa*, and 20X coverage for *Cryptococcus magnus*. Draft genomes were  
470 assembled with Flye [73] using default parameters and an estimated genome size of 20Mb.  
471 After assembly, the contigs were polished ten times with Racon [74] using nanopore reads,  
472 followed by one polishing with Medaka (ONT). Polished assembly was assessed completeness  
473 using BUSCO [75]. The assembly statistics were reported from Flye.

#### 474 **Database constructions**

475 For shotgun metagenomics analysis, we used three BLAST database and three kraken  
476 databases. Two databases (nt and RFD) are from the same NCBI source, downloaded in May  
477 2019. BLAST and kraken2 nt databases were downloaded using the updateblastdb.pl script  
478 from BLAST+ package[76] and the kraken2 program [29], respectively. The fasta files of RefSeq

479 fungal database was downloaded from the NCBI and converted to BLAST database using  
480 makblastdb command from the BLAST+ package[76], and was added to the kraken2 database  
481 library using kraken2 command [29]. We also build the standard kraken2 database for  
482 masking the contaminated regions within the fungal genomes using kraken2 command [29].  
483 To generate the mock community database with only the species from the mock community,  
484 we downloaded the genomes of all species in the mock community from the NCBI according  
485 to their accessions (Supplementary Table S1), and concatenated them with the three newly  
486 assembled genomes of *Candida rugosa*, *Candida mesorugosa* and *Cryptococcus magnus*.  
487 Following the previous pipeline [77], we then performed a kraken2 search to identify the  
488 potential contaminated regions in the concatenated fasta, and masked those regions using  
489 bedtools [71]. We also masked the low complexity regions using the dustmasker from BLAST+  
490 package [76]. To enable new genomes to be indexed by blastn, we updated the taxonomic  
491 map file by adding the fasta headers of the three new genomes and manually assigned their  
492 taxonomic ID in the file. Lastly, we used the makeblastdb program to construct the mock  
493 community database.

494 For amplicon data analysis, we used two versions of fungal ITS database from the NCBI and  
495 UNITE, plus the fungal 18S, 28S database from the NCBI. All of them are downloaded as fasta  
496 format in February 2020 and added to the kraken2 database library using kraken2 command  
497 [29].

#### 498 **Data analysis**

499 For Shotgun metagenomics datasets, we first used blastn (version 2.10.1) and kraken2  
500 (version 2.0.8) to assign the NCBI taxonomic ID for each Illumina contig or Nanopore read.  
501 During the classification, we found one contamination species *Purpureocillium lilacinum*

502 always present in all samples with a significant abundance (10-20%). Therefore, we added this  
503 species into the true species list. The best hit from BLAST or species with the highest k-mer  
504 counts for each read and/or contig was retained for further analysis. After classification, we  
505 used python pandas module to merge information from different output files, and used ete3  
506 module [78] to assign taxonomic information to each read or contigs. The relative abundance  
507 of each classification were calculated based on the total length of Nanopore reads of total  
508 coverage of Illumina contigs. We used python numpy and math module for all statistical  
509 analysis.

510 For amplicon datasets, we sequenced each sample with three technical replicates. The  
511 classification workflow was different for datasets with different sequencing technologies. We  
512 only used QIME2 workflow plus the UNITE database for the Illumina amplicon data, since it is  
513 the only widely used method for classification. The paired end reads were denoised using the  
514 DADA2[79] plugin and assigned taxonomic information using the q2-feature-classifier [80]  
515 plugin. The QIME2 classifier was trained by the database sequence before classification. The  
516 classification output .qzv files were visualized by the QIME2 view website  
517 (<https://view.qiime2.org/>) and the feature-frequency csv file was extracted from the website.  
518 We then used python numpy and math module for the mathematical analysis and used  
519 seaborn module for generating figures.

520 For nanopore amplicon datasets, we used kraken2 as the k-mer based algorithm and  
521 minimap2 as the alignment based algorithm. The kraken2 command is the same as the  
522 kraken2 analysis for the shotgun metagenomics datasets, only using different databases. For  
523 the minimap2 analysis, we extracted the accessions of the best hits from the output files, and  
524 searched their corresponding taxonomic ID from the NCBI taxonomic map (downloaded from

525 [https://ftp.ncbi.nih.gov/pub/taxonomy/accession2taxid/nucl\\_wgs.accession2taxid.gz](https://ftp.ncbi.nih.gov/pub/taxonomy/accession2taxid/nucl_wgs.accession2taxid.gz), in

526 June 2020) using python pandas module. We then merge information from different output  
527 files, and used ete3 module again to assign taxonomic information to each read.

528

## 529 **Declarations**

## 530 **Ethics approval and consent to participate**

531 Not applicable.

## 532 **Consent for publication**

533 Not applicable.

## 534 **Data Availability**

535 All sequencing data was submitted to NCBI Short Read Archive (SRA) under the BioProject  
536 PRJNA725368 including eight accessions: SRX10705648, SRX10705649, SRX10705650,  
537 SRX10705651, SRX10705695, SRX10705696 and SRX10705697.

## 538 **Competing interests**

539 The authors declare that they have no competing interests.

## 540 **Authors' contributions**

541 WM, ES, BS and JPR conceived the study and designed experiments. YH, LI and WTVH  
542 prepared the samples and generated sequencing data. YH, TE and AG performed the  
543 bioinformatics analysis. ES provided feedback on statistical analysis. All authors contributed  
544 to data analysis and manuscript writing. All authors read and approved the final manuscript.



## 545 **Acknowledgements**

546 We thank Dr. Yu Lin for the insightful discussion and valuable suggestions to our manuscript.

547 This work was supported by computational resources provided by the Australian Government  
548 through the National Computational Infrastructure (NCI) under the ANU Merit Allocation  
549 Scheme.

## 550 **Funding**

551 This study was supported by a National Health and Medical Research Council of Australia  
552 (NH&MRC) grant [#GNT1121936] to W.M., B.S. is supported by an Australian Research Council  
553 Future Fellowship FT180100024, and Y.H., E.S., J.R., and B.S. are supported by The Hermon  
554 Slade Foundation grant HSF\_17\_04.

555

## 556 **Figure Legends**

557 **Table 1.** The characteristics for each dataset.

558 **Table 2.** Assignment of published sequence data to genera after application of cut-offs to  
559 query coverage.

560 **Figure 1.** Analysis of shotgun metagenomics data. (A) Swarmplot showing the concordance in  
561 genus identification after varying either the alignment algorithm or querying different  
562 databases on different data inputs. nt = NCBI nucleotide database; RFD = RefSeq Fungi  
563 database; data inputs are indicated below the line (PD = pooled data; PB = pooled biomass);  
564 (B) Identification of fungal genera from PD samples. The classified proportion and precision  
565 were derived from different combinations of search algorithms and databases as indicated  
566 (box); (C) Identification of fungal genera from PB samples. The classification proportion and

567 precision were derived from the different combinations of search algorithms and databases  
568 as indicated.

569 **Figure 2.** Dynamics in precision, completeness and remaining rate after applying progressive  
570 cut-offs on BLAST alignment metrics. (A) Cut-offs applied to query length. (B) Cut-offs applied  
571 to alignment E-values. (C) Cut-offs applied to the percentage of identical matches. (D) Cut-  
572 offs applied to query coverage.

573 **Figure 3.** Benchmarking of amplicon datasets. (A) Scatter plot represented genus level  
574 classification proportion and precision for nanopore amplicon data. (B) Genus level precision  
575 of Illumina amplicon data. Classification proportion of Illumina data were 100% due to the  
576 nature of the QIIME2 pipeline (based on the UNITE ITS database). (C) Genus level  
577 completeness of both nanopore and Illumina amplicon datasets. The nanopore results are  
578 from minimap2 algorithm and uniteITS database.

579 **Figure 4.** Improving community composition analysis by applying query coverage cut-offs. (A)  
580 Experimental flowchart for analysing community compositions. (B) Statistical similarity  
581 measures between gold standard community composition and each combination of  
582 algorithms and databases. Lower values correspond to greater similarity between the  
583 samples and the gold standard. (C) Change in Bhattacharyya distance after applying cut-offs  
584 to query coverage for each dataset as indicated. The query coverage gap between each dot  
585 point is 0.5%. (D) Change in relative Euclidean distance after applying cut-offs to query  
586 coverage for each dataset. The gap between each dot point is 0.5%. (E) Change in relative  
587 entropy after applying cut-offs on query coverage for each dataset. The gap between each  
588 dot point is 0.5%.

589 **Supplementary Table S1.** Metadata of the mock fungal community

590 **Supplementary Table S2.** Assembly statistics of the draft genomes of *Candida rugosa*,  
591 *Candida mesorugosa* and *Cryptococcus magnus* in the mock fungal community.

592 **Supplementary Figure S1.** Change of alignment metrics after applying cut-offs on Phred score.

593

## 594 Reference

595 1. Hawksworth DL, Lücking R. Fungal Diversity Revisited: 2.2 to 3.8 Million Species. *Fungal*  
596 *Kingd.* 2017;79–95.

597 2. Cheek M, Lughadha EN, Kirk P, Lindon H, Carretero J, Looney B, et al. New scientific  
598 discoveries: Plants and fungi. *PLANTS PEOPLE PLANET.* 2020;2:371–88.

599 3. Mora C, Tittensor DP, Adl S, Simpson AGB, Worm B. How Many Species Are There on Earth  
600 and in the Ocean? *PLOS Biol. Public Library of Science;* 2011;9:e1001127.

601 4. Freimoser F. Start teaching mycology! [Internet]. *Nat. Res. Microbiol. Community.* 2017  
602 [cited 2021 Jan 6]. Available from:  
603 <https://naturemicrobiologycommunity.nature.com/posts/20287-start-teaching-mycology>

604 5. Editorial. Stop neglecting fungi. *Nat Microbiol. Nature Publishing Group;* 2017;2:1–2.

605 6. Fisher MC, Gurr SJ, Cuomo CA, Blehert DS, Jin H, Stukenbrock EH, et al. Threats Posed by  
606 the Fungal Kingdom to Humans, Wildlife, and Agriculture. *mBio* [Internet]. American Society  
607 for Microbiology; 2020 [cited 2021 Jan 6];11. Available from:  
608 <https://mbio.asm.org/content/11/3/e00449-20>

609 7. Scheele BC, Pasmans F, Skerratt LF, Berger L, Martel A, Beukema W, et al. Amphibian fungal  
610 panzootic causes catastrophic and ongoing loss of biodiversity. *Science. American Association*  
611 *for the Advancement of Science;* 2019;363:1459–63.

612 8. Naranjo-Ortiz MA, Gabaldón T. Fungal evolution: diversity, taxonomy and phylogeny of the  
613 Fungi. *Biol Rev.* 2019;94:2101–37.

614 9. Valverde ME, Hernández-Pérez T, Paredes-López O. Edible Mushrooms: Improving Human  
615 Health and Promoting Quality Life [Internet]. *Int. J. Microbiol. Hindawi;* 2015 [cited 2020 Oct  
616 19]. p. e376387. Available from: <https://www.hindawi.com/journals/ijmicro/2015/376387/>

617 10. Kong HH, Segre JA. Cultivating fungal research. *Science. American Association for the*  
618 *Advancement of Science;* 2020;368:365–6.

619 11. Whittaker RH. New Concepts of Kingdoms of Organisms. *Science. American Association*  
620 *for the Advancement of Science;* 1969;163:150–60.

- 621 12. James TY, Kauff F, Schoch CL, Matheny PB, Hofstetter V, Cox CJ, et al. Reconstructing the  
622 early evolution of Fungi using a six-gene phylogeny. *Nature*. Nature Publishing Group;  
623 2006;443:818–22.
- 624 13. White MM, James TY, O'Donnell K, Cafaro MJ, Tanabe Y, Sugiyama J. Phylogeny of the  
625 Zygomycota based on nuclear ribosomal sequence data. *Mycologia*. Taylor & Francis;  
626 2006;98:872–84.
- 627 14. James TY, Letcher PM, Longcore JE, Mozley-Standridge SE, Porter D, Powell MJ, et al. A  
628 molecular phylogeny of the flagellated fungi (Chytridiomycota) and description of a new  
629 phylum (Blastocladiomycota). *Mycologia*. Taylor & Francis; 2006;98:860–71.
- 630 15. Fischer WM, Palmer JD. Evidence from small-subunit ribosomal RNA sequences for a  
631 fungal origin of Microsporidia. *Mol Phylogenet Evol*. 2005;36:606–22.
- 632 16. Keeling PJ, Luker MA, Palmer JD. Evidence from Beta-Tubulin Phylogeny that  
633 Microsporidia Evolved from Within the Fungi. *Mol Biol Evol*. 2000;17:23–31.
- 634 17. Jones MDM, Forn I, Gadelha C, Egan MJ, Bass D, Massana R, et al. Discovery of novel  
635 intermediate forms redefines the fungal tree of life. *Nature*. Nature Publishing Group;  
636 2011;474:200–3.
- 637 18. Adl SM, Simpson AGB, Lane CE, Lukeš J, Bass D, Bowser SS, et al. The Revised Classification  
638 of Eukaryotes. *J Eukaryot Microbiol*. 2012;59:429–514.
- 639 19. Raja HA, Miller AN, Pearce CJ, Oberlies NH. Fungal Identification Using Molecular Tools: A  
640 Primer for the Natural Products Research Community. *J Nat Prod*. 2017;80:756–70.
- 641 20. Schirmer M, Ijaz UZ, D'Amore R, Hall N, Sloan WT, Quince C. Insight into biases and  
642 sequencing errors for amplicon sequencing with the Illumina MiSeq platform. *Nucleic Acids*  
643 *Res*. 2015;43:e37.
- 644 21. Filippis FD, Laiola M, Blaiotta G, Ercolini D. Different Amplicon Targets for Sequencing-  
645 Based Studies of Fungal Diversity. *Appl Environ Microbiol* [Internet]. American Society for  
646 Microbiology; 2017 [cited 2021 Feb 15];83. Available from:  
647 <https://aem.asm.org/content/83/17/e00905-17>
- 648 22. Frau A, Kenny JG, Lenzi L, Campbell BJ, Ijaz UZ, Duckworth CA, et al. DNA extraction and  
649 amplicon production strategies deeply influence the outcome of gut mycobiome studies. *Sci*  
650 *Rep*. Nature Publishing Group; 2019;9:9328.
- 651 23. Heeger F, Bourne EC, Baschien C, Yurkov A, Bunk B, Spröer C, et al. Long-read DNA  
652 metabarcoding of ribosomal RNA in the analysis of fungi from aquatic environments. *Mol Ecol*  
653 *Resour*. 2018;18:1500–14.
- 654 24. D'Andrea S, Cuscó A, Francino O. Rapid and real-time identification of fungi up to the  
655 species level with long amplicon Nanopore sequencing from clinical samples. *bioRxiv*. Cold  
656 Spring Harbor Laboratory; 2020;2020.02.06.936708.

- 657 25. Quince C, Walker AW, Simpson JT, Loman NJ, Segata N. Shotgun metagenomics, from  
658 sampling to analysis. *Nat Biotechnol.* 2017;35:833–44.
- 659 26. Marcelino VR, Clausen PTLC, Buchmann JP, Wille M, Iredell JR, Meyer W, et al. CCMetagen:  
660 comprehensive and accurate identification of eukaryotes and prokaryotes in metagenomic  
661 data. *Genome Biol.* 2020;21:103.
- 662 27. Altschul SF, Gish W, Miller W, Myers EW, Lipman DJ. Basic local alignment search tool. *J*  
663 *Mol Biol.* 1990;215:403–10.
- 664 28. Wood DE, Salzberg SL. Kraken: ultrafast metagenomic sequence classification using exact  
665 alignments. *Genome Biol.* 2014;15:R46.
- 666 29. Wood DE, Lu J, Langmead B. Improved metagenomic analysis with Kraken 2. *Genome Biol.*  
667 2019;20:257.
- 668 30. Beghini F, McIver LJ, Blanco-Míguez A, Dubois L, Asnicar F, Maharjan S, et al. Integrating  
669 taxonomic, functional, and strain-level profiling of diverse microbial communities with  
670 bioBakery 3. *bioRxiv. Cold Spring Harbor Laboratory; 2020;2020.11.19.388223.*
- 671 31. Zielezinski A, Girgis HZ, Bernard G, Leimeister C-A, Tang K, Dencker T, et al. Benchmarking  
672 of alignment-free sequence comparison methods. *Genome Biol.* 2019;20:144.
- 673 32. McIntyre ABR, Ounit R, Afshinnkoo E, Prill RJ, Hénaff E, Alexander N, et al. Comprehensive  
674 benchmarking and ensemble approaches for metagenomic classifiers. *Genome Biol.*  
675 2017;18:182.
- 676 33. Ye SH, Siddle KJ, Park DJ, Sabeti PC. Benchmarking Metagenomics Tools for Taxonomic  
677 Classification. *Cell.* 2019;178:779–94.
- 678 34. Nasko DJ, Koren S, Phillippy AM, Treangen TJ. RefSeq database growth influences the  
679 accuracy of k-mer-based lowest common ancestor species identification. *Genome Biol.*  
680 2018;19:165.
- 681 35. R. Marcelino V, Holmes EC, Sorrell TC. The use of taxon-specific reference databases  
682 compromises metagenomic classification. *BMC Genomics.* 2020;21:184.
- 683 36. Heeger F, Wurzbacher C, Bourne EC, Mazzoni CJ, Monaghan MT. Combining the 5.8S and  
684 ITS2 to improve classification of fungi. *Methods Ecol Evol.* 2019;10:1702–11.
- 685 37. NCBI Resource Coordinators. Database resources of the National Center for Biotechnology  
686 Information. *Nucleic Acids Res.* 2018;46:D8–13.
- 687 38. O’Leary NA, Wright MW, Brister JR, Ciuffo S, Haddad D, McVeigh R, et al. Reference  
688 sequence (RefSeq) database at NCBI: current status, taxonomic expansion, and functional  
689 annotation. *Nucleic Acids Res.* 2016;44:D733–45.
- 690 39. Altschul SF, Madden TL, Schäffer AA, Zhang J, Zhang Z, Miller W, et al. Gapped BLAST and  
691 PSI-BLAST: a new generation of protein database search programs. *Nucleic Acids Res.*  
692 1997;25:3389–402.

- 693 40. Xiao L, Feng Q, Liang S, Sonne SB, Xia Z, Qiu X, et al. A catalog of the mouse gut  
694 metagenome. *Nat Biotechnol.* Nature Publishing Group; 2015;33:1103–8.
- 695 41. Hu Y, Green GS, Milgate AW, Stone EA, Rathjen JP, Schwessinger B. Pathogen Detection  
696 and Microbiome Analysis of Infected Wheat Using a Portable DNA Sequencer. *Phytobiomes J.*  
697 *Scientific Societies*; 2019;3:92–101.
- 698 42. Irinyi L, Hu Y, Hoang MTV, Pasic L, Halliday C, Jayawardena M, et al. Long-read sequencing  
699 based clinical metagenomics for the detection and confirmation of *Pneumocystis jirovecii*  
700 directly from clinical specimens: A paradigm shift in mycological diagnostics. *Med Mycol.*  
701 *Oxford Academic*; 2020;58:650–60.
- 702 43. Xiao L, Estellé J, Kiilerich P, Ramayo-Caldas Y, Xia Z, Feng Q, et al. A reference gene  
703 catalogue of the pig gut microbiome. *Nat Microbiol.* Nature Publishing Group; 2016;1:1–6.
- 704 44. Donovan PD, Gonzalez G, Higgins DG, Butler G, Ito K. Identification of fungi in shotgun  
705 metagenomics datasets. *PLOS ONE.* Public Library of Science; 2018;13:e0192898.
- 706 45. Holman DB, Brunelle BW, Trachsel J, Allen HK. Meta-analysis To Define a Core Microbiota  
707 in the Swine Gut. *mSystems.* 2017;2.
- 708 46. Wang J, Lang T, Shen J, Dai J, Tian L, Wang X. Core Gut Bacteria Analysis of Healthy Mice.  
709 *Front Microbiol* [Internet]. *Frontiers*; 2019 [cited 2021 Jan 6];10. Available from:  
710 <https://www.frontiersin.org/articles/10.3389/fmicb.2019.00887/full>
- 711 47. White TJ, Bruns T, Lee S, Taylor J. AMPLIFICATION AND DIRECT SEQUENCING OF FUNGAL  
712 RIBOSOMAL RNA GENES FOR PHYLOGENETICS. *PCR Protoc* [Internet]. Elsevier; 1990 [cited  
713 2021 Mar 19]. p. 315–22. Available from:  
714 <https://linkinghub.elsevier.com/retrieve/pii/B9780123721808500421>
- 715 48. Nilsson RH, Larsson K-H, Taylor AFS, Bengtsson-Palme J, Jeppesen TS, Schigel D, et al. The  
716 UNITE database for molecular identification of fungi: handling dark taxa and parallel  
717 taxonomic classifications. *Nucleic Acids Res.* *Oxford Academic*; 2019;47:D259–64.
- 718 49. Bharti R, Grimm DG. Current challenges and best-practice protocols for microbiome  
719 analysis. *Brief Bioinform* [Internet]. 2019 [cited 2021 Jan 7]; Available from:  
720 <https://doi.org/10.1093/bib/bbz155>
- 721 50. Bolyen E, Rideout JR, Dillon MR, Bokulich NA, Abnet CC, Al-Ghalith GA, et al. Reproducible,  
722 interactive, scalable and extensible microbiome data science using QIIME 2. *Nat Biotechnol.*  
723 *Nature Publishing Group*; 2019;37:852–7.
- 724 51. Johnson JS, Spakowicz DJ, Hong B-Y, Petersen LM, Demkowicz P, Chen L, et al. Evaluation  
725 of 16S rRNA gene sequencing for species and strain-level microbiome analysis. *Nat Commun.*  
726 *Nature Publishing Group*; 2019;10:5029.
- 727 52. Krehenwinkel H, Pomerantz A, Henderson JB, Kennedy SR, Lim JY, Swamy V, et al.  
728 Nanopore sequencing of long ribosomal DNA amplicons enables portable and simple  
729 biodiversity assessments with high phylogenetic resolution across broad taxonomic scale.

- 730 GigaScience [Internet]. 2019 [cited 2021 Jan 7];8. Available from:  
731 <https://doi.org/10.1093/gigascience/giz006>
- 732 53. Dokmanic I, Parhizkar R, Ranieri J, Vetterli M. Euclidean Distance Matrices: Essential  
733 Theory, Algorithms and Applications. 2015 [cited 2021 Jan 7]; Available from:  
734 <https://arxiv.org/abs/1502.07541v2>
- 735 54. Aherne FJ, Thacker NA, Rockett PI. The Bhattacharyya metric as an absolute similarity  
736 measure for frequency coded data. *Kybernetika*. 1998;34:363–8.
- 737 55. MacKay DJC, Kay DJCM. Information Theory, Inference and Learning Algorithms.  
738 Cambridge University Press; 2003.
- 739 56. Henderson G, Cox F, Kittelmann S, Miri VH, Zethof M, Noel SJ, et al. Effect of DNA  
740 Extraction Methods and Sampling Techniques on the Apparent Structure of Cow and Sheep  
741 Rumen Microbial Communities. *PLOS ONE*. Public Library of Science; 2013;8:e74787.
- 742 57. Davis A, Kohler C, Alsallaq R, Hayden R, Maron G, Margolis E. Improved yield and accuracy  
743 for DNA extraction in microbiome studies with variation in microbial biomass. *BioTechniques*.  
744 Future Science; 2019;66:285–9.
- 745 58. Douglas CA, Ivey KL, Papanicolas LE, Best KP, Muhlhausler BS, Rogers GB. DNA extraction  
746 approaches substantially influence the assessment of the human breast milk microbiome. *Sci*  
747 *Rep*. Nature Publishing Group; 2020;10:123.
- 748 59. Tamames J, Cobo-Simón M, Puente-Sánchez F. Assessing the performance of different  
749 approaches for functional and taxonomic annotation of metagenomes. *BMC Genomics*.  
750 2019;20:960.
- 751 60. Liang Q, Bible PW, Liu Y, Zou B, Wei L. DeepMicrobes: taxonomic classification for  
752 metagenomics with deep learning. *NAR Genomics Bioinforma* [Internet]. 2020 [cited 2021 Jan  
753 6];2. Available from: <https://doi.org/10.1093/nargab/lqaa009>
- 754 61. Pearman WS, Freed NE, Silander OK. Testing the advantages and disadvantages of short-  
755 and long- read eukaryotic metagenomics using simulated reads. *BMC Bioinformatics*.  
756 2020;21:220.
- 757 62. Mallawaarachchi V, Wickramarachchi A, Lin Y. GraphBin: refined binning of metagenomic  
758 contigs using assembly graphs. *Bioinformatics*. 2020;36:3307–13.
- 759 63. Alneberg J, Bjarnason BS, de Bruijn I, Schirmer M, Quick J, Ijaz UZ, et al. Binning  
760 metagenomic contigs by coverage and composition. *Nat Methods*. Nature Publishing Group;  
761 2014;11:1144–6.
- 762 64. Wickramarachchi A, Mallawaarachchi V, Rajan V, Lin Y. MetaBCC-LR: metagenomics  
763 binning by coverage and composition for long reads. *Bioinformatics*. 2020;36:i3–11.

- 764 65. Kaehler BD, Bokulich NA, McDonald D, Knight R, Caporaso JG, Huttenhower G. Species  
765 abundance information improves sequence taxonomy classification accuracy. *Nat Commun.*  
766 Nature Publishing Group; 2019;10:4643.
- 767 66. Bokulich NA, Dillon MR, Bolyen E, Kaehler BD, Huttenhower G, Caporaso JG. q2-sample-  
768 classifier: machine-learning tools for microbiome classification and regression. *J Open Res*  
769 *Softw* [Internet]. 2018 [cited 2021 Jan 6];3. Available from:  
770 <https://www.ncbi.nlm.nih.gov/pmc/articles/PMC6759219/>
- 771 67. Bolger AM, Lohse M, Usadel B. Trimmomatic: a flexible trimmer for Illumina sequence  
772 data. *Bioinformatics*. 2014;30:2114–20.
- 773 68. Peng Y, Leung HCM, Yiu SM, Chin FYL. IDBA-UD: a de novo assembler for single-cell and  
774 metagenomic sequencing data with highly uneven depth. *Bioinformatics*. Oxford Academic;  
775 2012;28:1420–8.
- 776 69. Li H, Durbin R. Fast and accurate short read alignment with Burrows–Wheeler transform.  
777 *Bioinformatics*. 2009;25:1754–60.
- 778 70. Li H, Handsaker B, Wysoker A, Fennell T, Ruan J, Homer N, et al. The Sequence  
779 Alignment/Map format and SAMtools. *Bioinformatics*. 2009;25:2078–9.
- 780 71. Quinlan AR, Hall IM. BEDTools: a flexible suite of utilities for comparing genomic features.  
781 *Bioinformatics*. Oxford Academic; 2010;26:841–2.
- 782 72. Hu Y, Schwessinger B. Amplicon sequencing using MinION optimized from 1D native  
783 barcoding genomic DNA [Internet]. *protocols.io*. 2018 [cited 2018 Sep 27]. Available from:  
784 [https://www.protocols.io/view/amplicon-sequencing-using-minion-optimized-from-1d-](https://www.protocols.io/view/amplicon-sequencing-using-minion-optimized-from-1d-mhkc34w)  
785 [mhkc34w](https://www.protocols.io/view/amplicon-sequencing-using-minion-optimized-from-1d-mhkc34w)
- 786 73. Kolmogorov M, Yuan J, Lin Y, Pevzner PA. Assembly of long, error-prone reads using repeat  
787 graphs. *Nat Biotechnol*. Nature Publishing Group; 2019;37:540–6.
- 788 74. Vaser R, Sović I, Nagarajan N, Šikić M. Fast and accurate de novo genome assembly from  
789 long uncorrected reads. *Genome Res*. 2017;27:737–46.
- 790 75. Simão FA, Waterhouse RM, Ioannidis P, Kriventseva EV, Zdobnov EM. BUSCO: assessing  
791 genome assembly and annotation completeness with single-copy orthologs. *Bioinformatics*.  
792 Oxford Academic; 2015;31:3210–2.
- 793 76. Camacho C, Coulouris G, Avagyan V, Ma N, Papadopoulos J, Bealer K, et al. BLAST+:  
794 architecture and applications. *BMC Bioinformatics*. 2009;10:421.
- 795 77. Lu J, Salzberg SL. Removing contaminants from databases of draft genomes. *PLOS Comput*  
796 *Biol*. 2018;14:e1006277.
- 797 78. Huerta-Cepas J, Serra F, Bork P. ETE 3: Reconstruction, Analysis, and Visualization of  
798 Phylogenomic Data. *Mol Biol Evol*. 2016;33:1635–8.



799 79. Callahan BJ, McMurdie PJ, Rosen MJ, Han AW, Johnson AJA, Holmes SP. DADA2: High-  
800 resolution sample inference from Illumina amplicon data. *Nat Methods*. Nature Publishing  
801 Group; 2016;13:581–3.

802 80. Bokulich NA, Kaehler BD, Rideout JR, Dillon M, Bolyen E, Knight R, et al. Optimizing  
803 taxonomic classification of marker-gene amplicon sequences with QIIME 2's q2-feature-  
804 classifier plugin. *Microbiome*. 2018;6:90.

805

Table 1. The characteristics for each dataset.

| Sample | Sequencing Tech | Sequencing Strategy | # Basepairs                     | # reads                          | # Assembled contigs | # Mapped basepairs (Gb) |
|--------|-----------------|---------------------|---------------------------------|----------------------------------|---------------------|-------------------------|
| PD     | Illumina        | Shotgun             | 3.91 Gb                         | 14525058                         | 338823              | 3.69                    |
|        |                 | Amplicon            | 66.9/95.8/106.4 Mb <sup>a</sup> | 39374/9614/10236 <sup>b</sup>    | N/A                 | N/A                     |
|        | Nanopore        | Shotgun             | 1.96 Gb                         | 1273484                          | N/A                 | N/A                     |
|        |                 | Amplicon            | 71.5/72.5/86.5 Mb               | 26212/ 26680/ 31826 <sup>b</sup> | N/A                 | N/A                     |
| PB     | Illumina        | Shotgun             | 3.67 Gb                         | 13623120                         | 345009              | 3.44                    |
|        |                 | Amplicon            | 55.7/38.1/71.9 Mb <sup>a</sup>  | 23613/13828/27093 <sup>b</sup>   | N/A                 | N/A                     |
|        | Nanopore        | Shotgun             | 3.78 Gb                         | 1043343                          | N/A                 | N/A                     |
|        |                 | Amplicon            | 54.5/49.4/42.0 Mb               | 20163/ 18273/ 15502 <sup>b</sup> | N/A                 | N/A                     |

<sup>a</sup> The total basepairs of each technical replicate were calculated before importing into QIIME2 pipeline.

<sup>b</sup> Number of nanopore reads or paired-end Illumina reads for technical replicate 1/replicate 2/replicate 3 after quality control.

Table 2. Assignment of published sequence data to genera after application of cut-offs to query coverage.

| Sample ID | Sample description                         | Sequencing tech | Cut-offs on query coverage (%) | Filtered results (%) | Percentage of confirmed genera <b>BEFORE</b> applying cut-offs (%) | Percentage of confirmed genera <b>AFTER</b> applying cut-offs (%) |
|-----------|--------------------------------------------|-----------------|--------------------------------|----------------------|--------------------------------------------------------------------|-------------------------------------------------------------------|
| a1        | Human sputum samples <sup>42</sup>         | Nanopore        | 59                             | 20.2                 | 85.9                                                               | 86.5                                                              |
| a2        |                                            |                 | 53.2                           | 20.1                 | 97.9                                                               | 98.5                                                              |
| a3        |                                            |                 | 54                             | 20.5                 | 96.5                                                               | 97.4                                                              |
| a4        |                                            |                 | 45.5                           | 20.1                 | 16.2                                                               | 19.8                                                              |
| a5        |                                            |                 | 58.5                           | 20                   | 71.1                                                               | 66.9                                                              |
| a6        |                                            |                 | 50.4                           | 20.1                 | 93.6                                                               | 94.7                                                              |
| b1        | Field infected wheat samples <sup>41</sup> |                 | 5                              | 20                   | 60.4                                                               | 75.1                                                              |
| b2        |                                            |                 | 0.77                           | 19.9                 | 34.8                                                               | 43                                                                |
| b3        |                                            |                 | 12                             | 19.7                 | 67                                                                 | 82                                                                |
| b4        |                                            |                 | 0.61                           | 20                   | 5.8                                                                | 6.2                                                               |
| c1        | Pig gut microbiome samples <sup>43</sup>   | Illumina        | 2.4                            | 20.1                 | 32                                                                 | 35.4                                                              |
| c2        |                                            |                 | 3.3                            | 20.2                 | 34.2                                                               | 36.6                                                              |
| c3        |                                            |                 | 2.6                            | 20.2                 | 35.2                                                               | 38.3                                                              |
| d1        | Mouse gut microbiome samples <sup>40</sup> |                 | 3.4                            | 19.8                 | 29.1                                                               | 24.3                                                              |
| d2        |                                            |                 | 14                             | 20.1                 | 63.7                                                               | 69.4                                                              |
| d3        |                                            |                 | 4.5                            | 20.2                 | 38.6                                                               | 42.3                                                              |

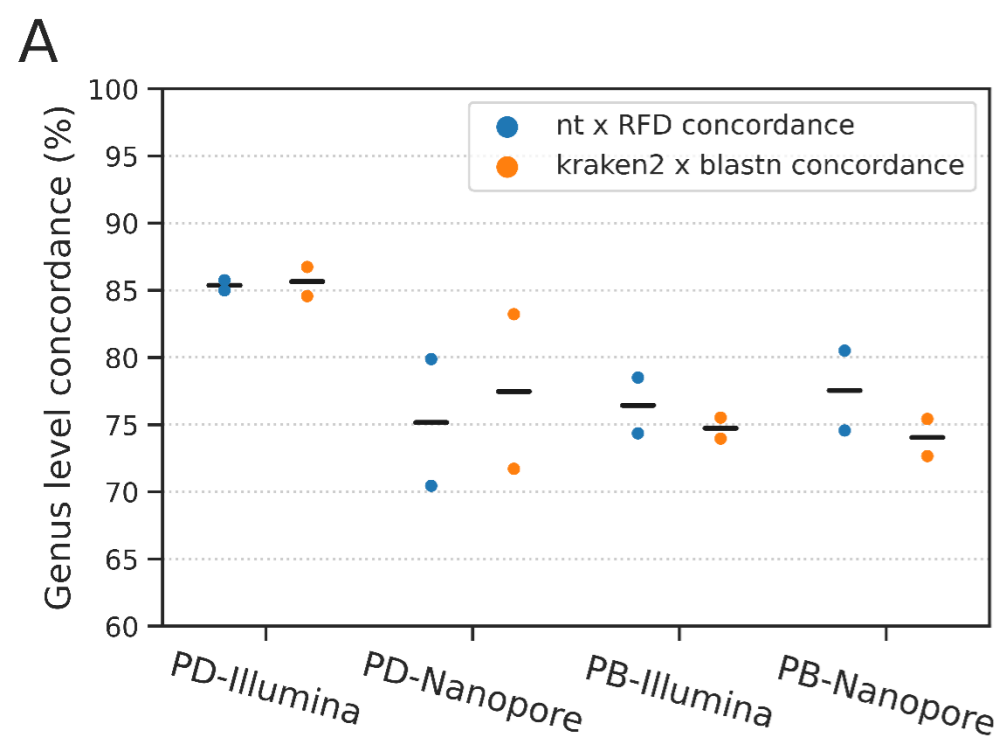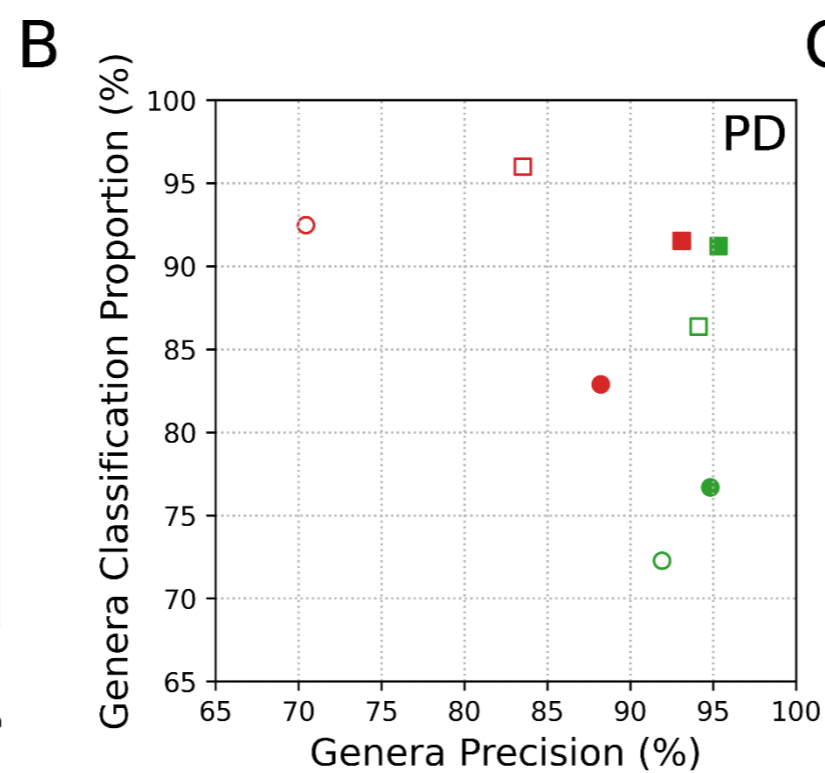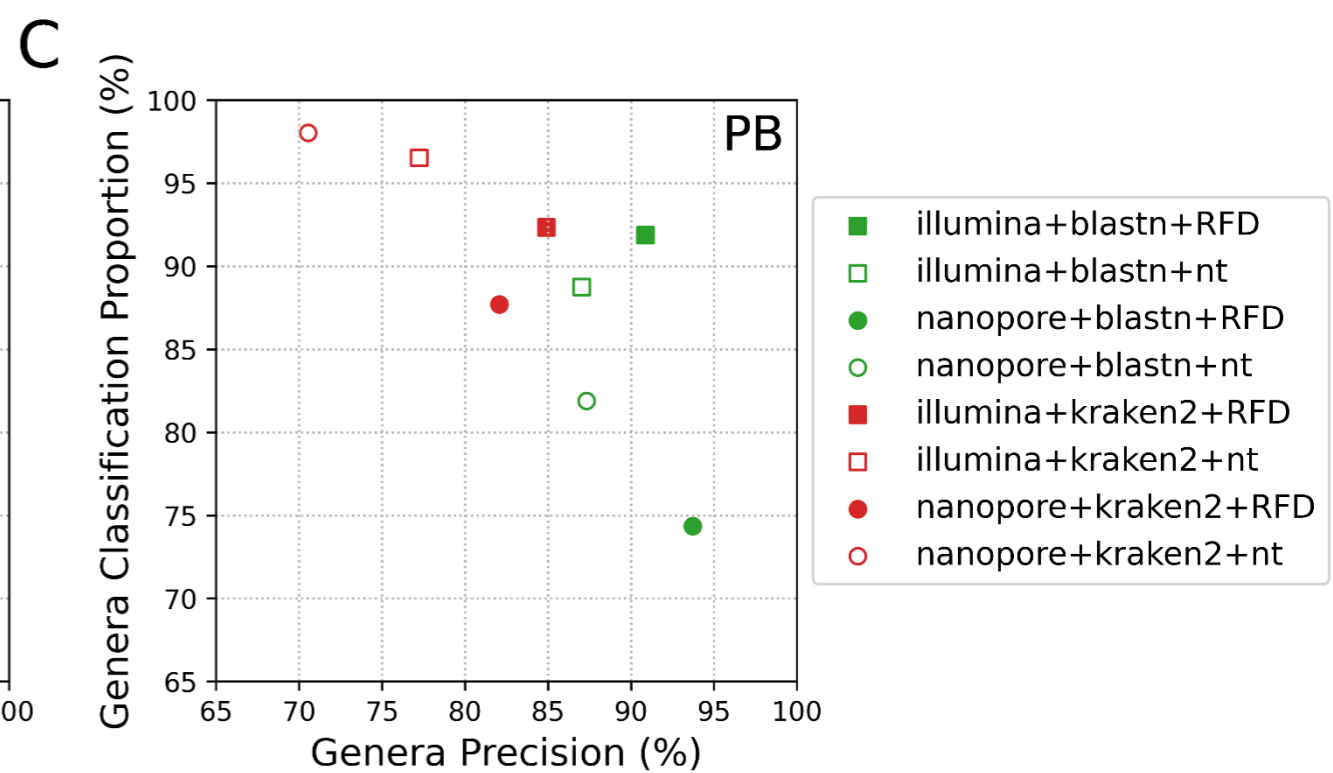

**A**

Illumina

Nanopore

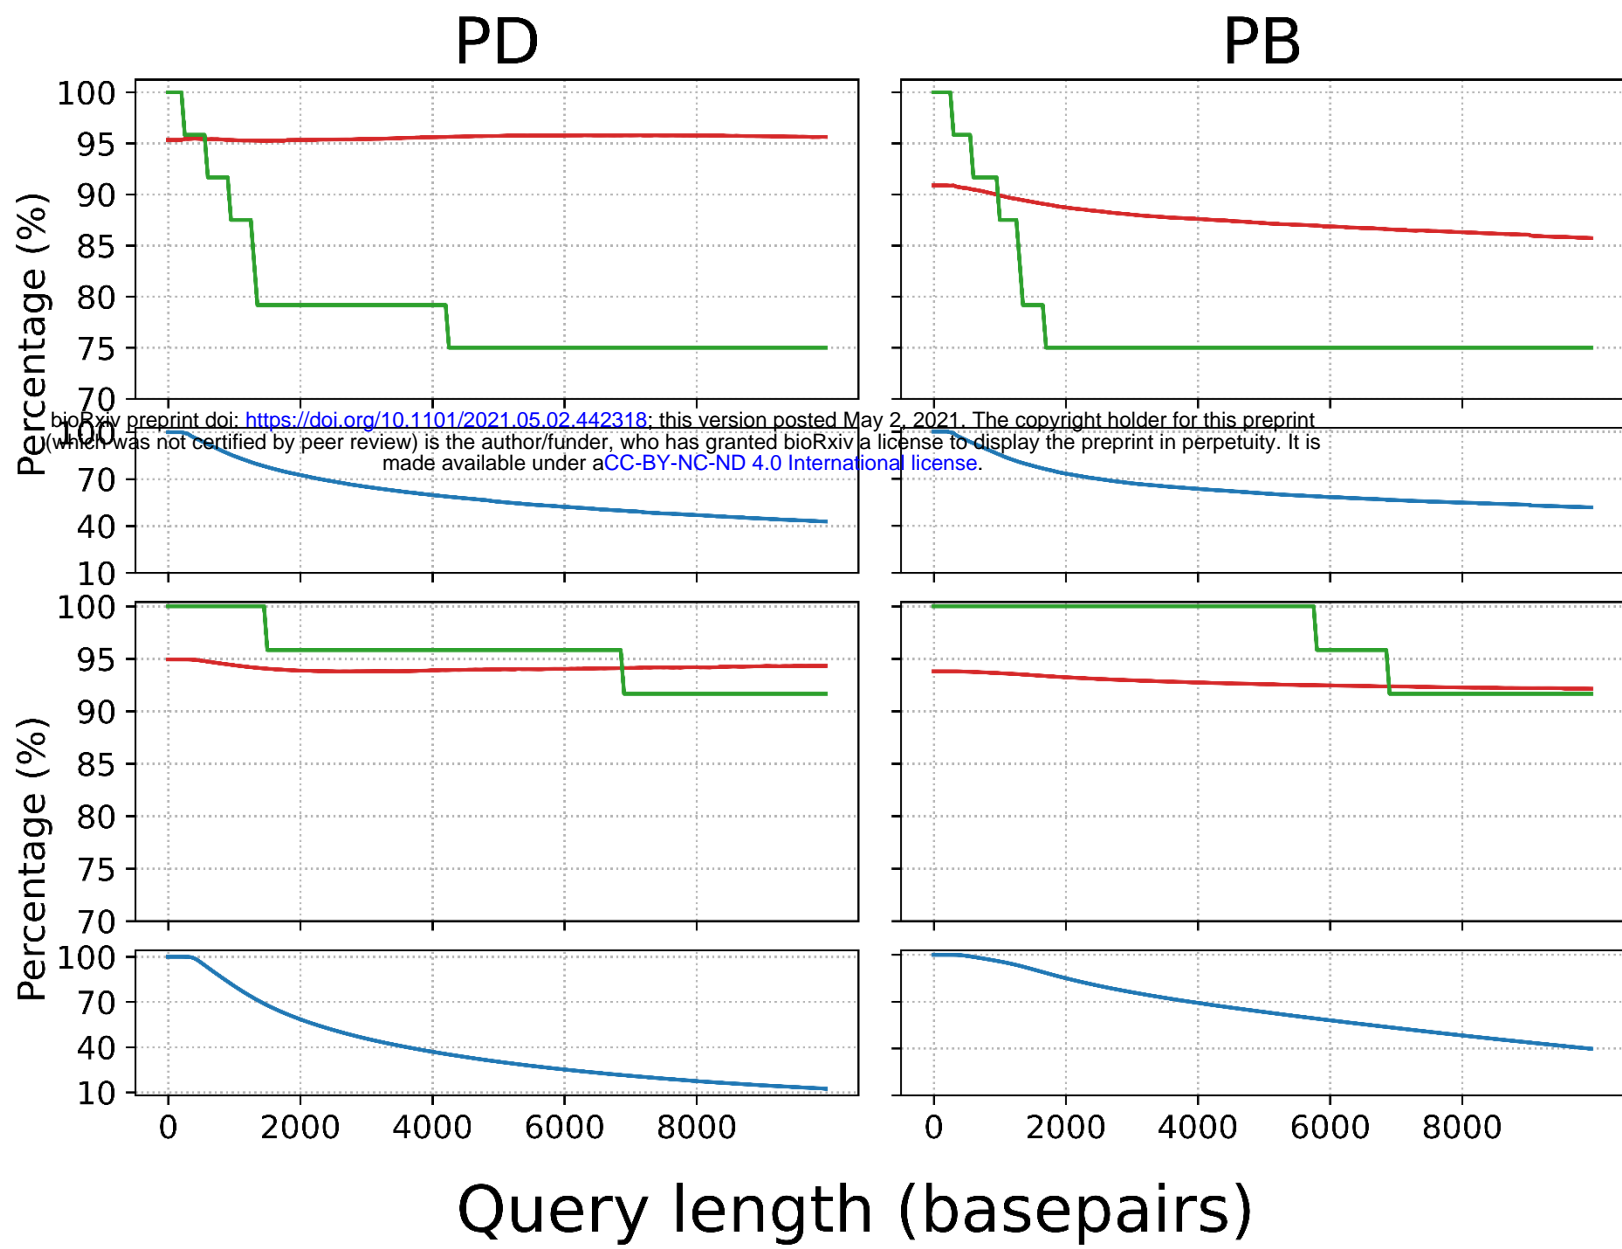**B**

Illumina

Nanopore

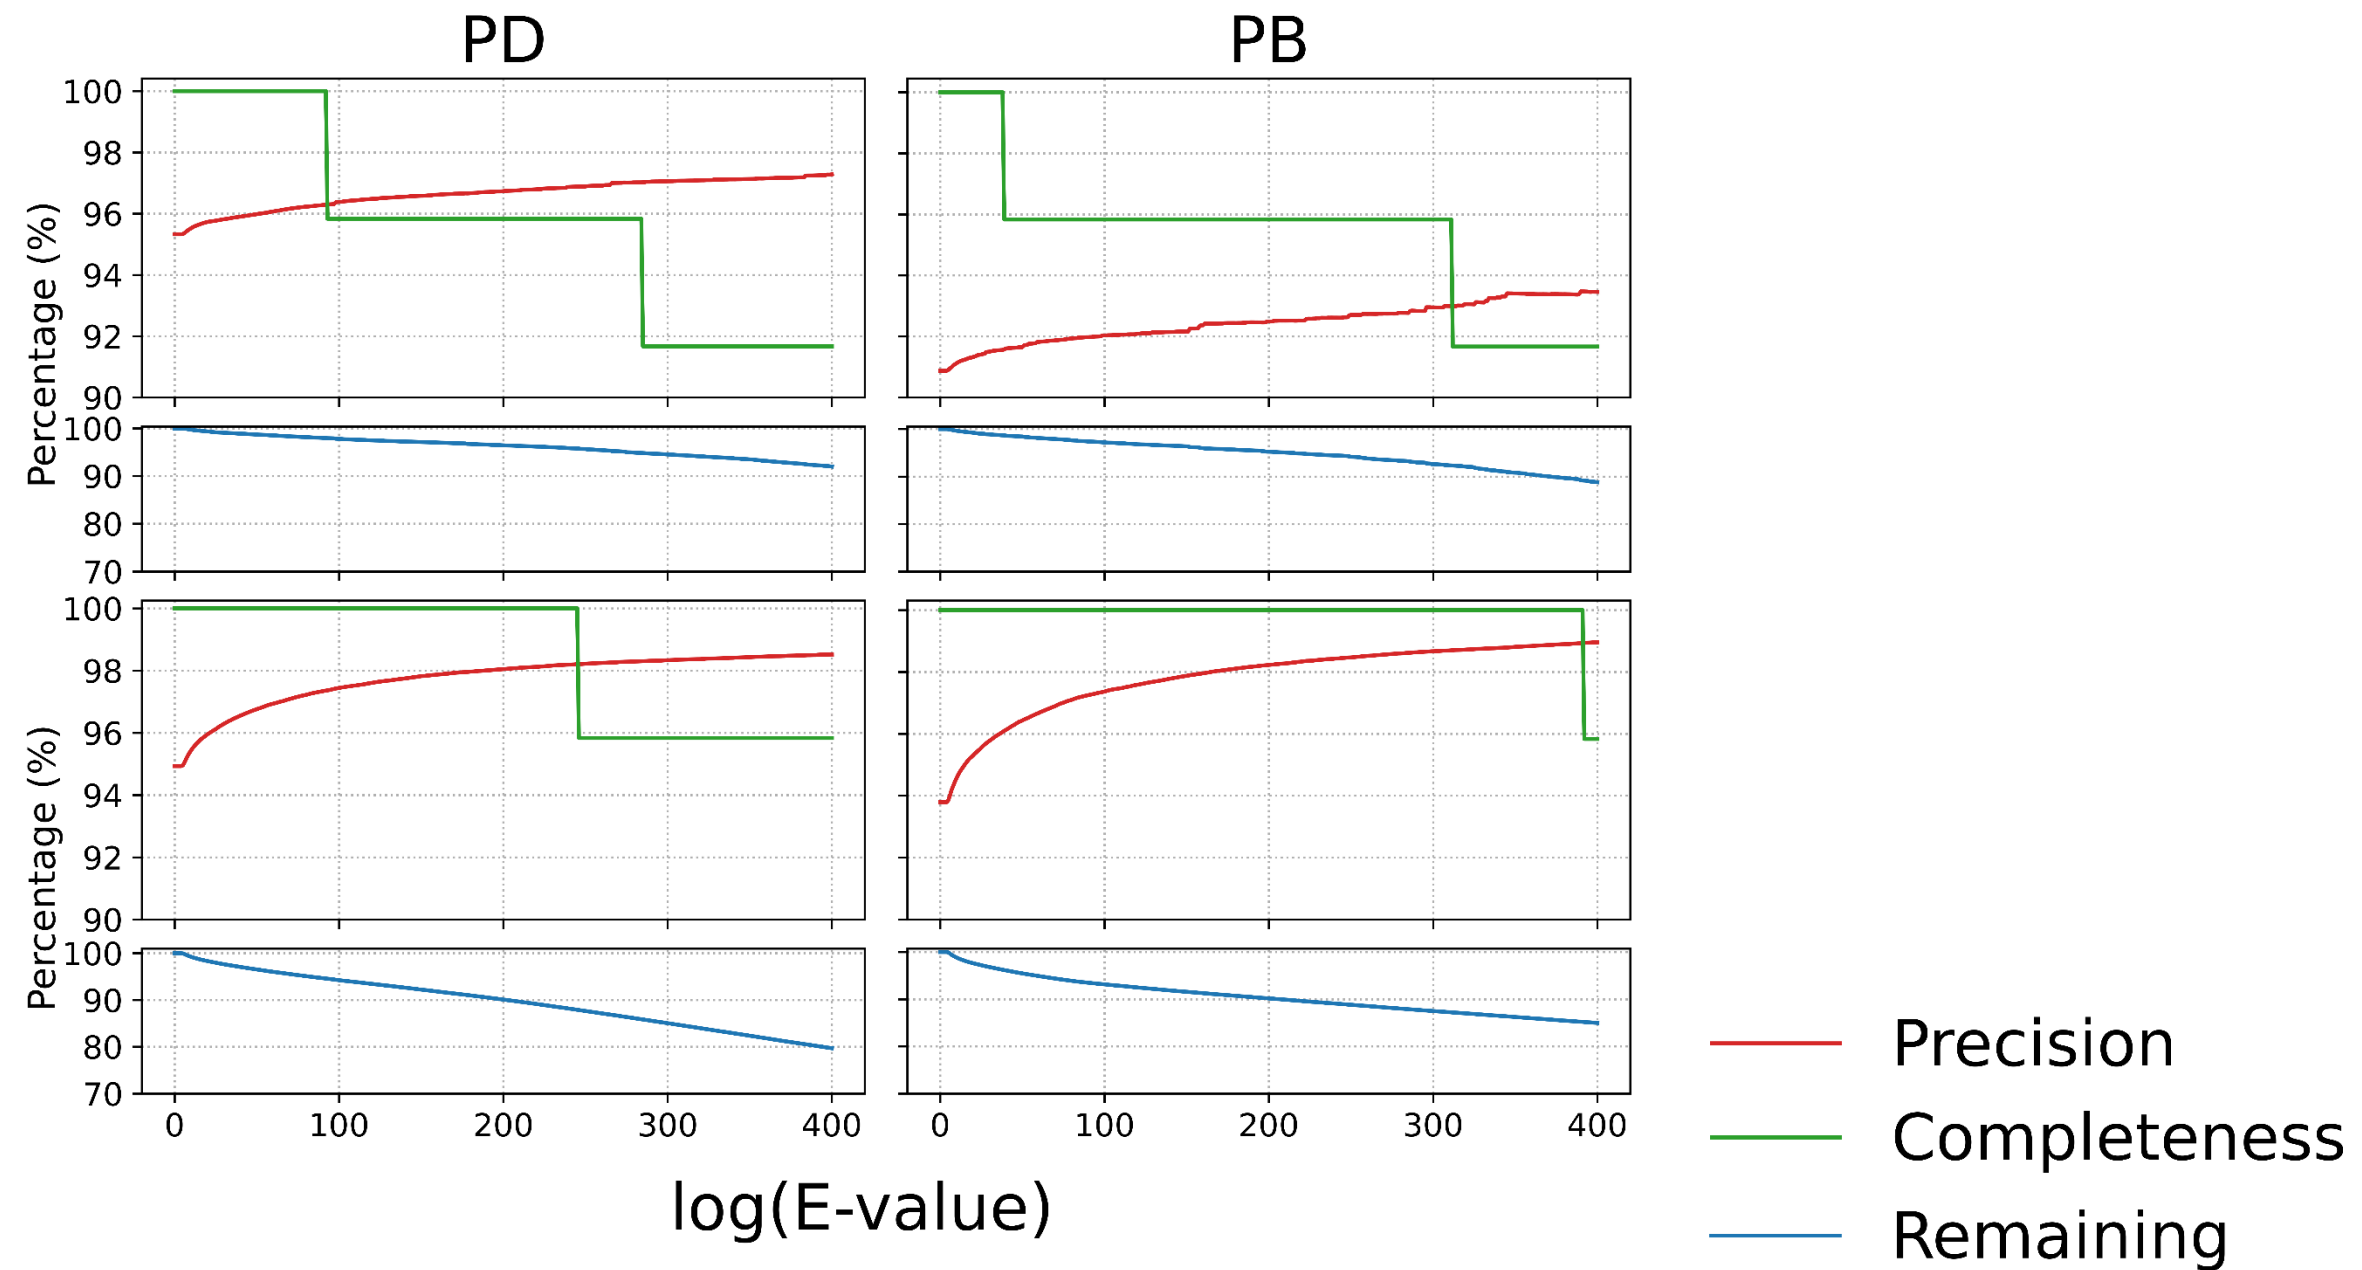**C**

Illumina

Nanopore

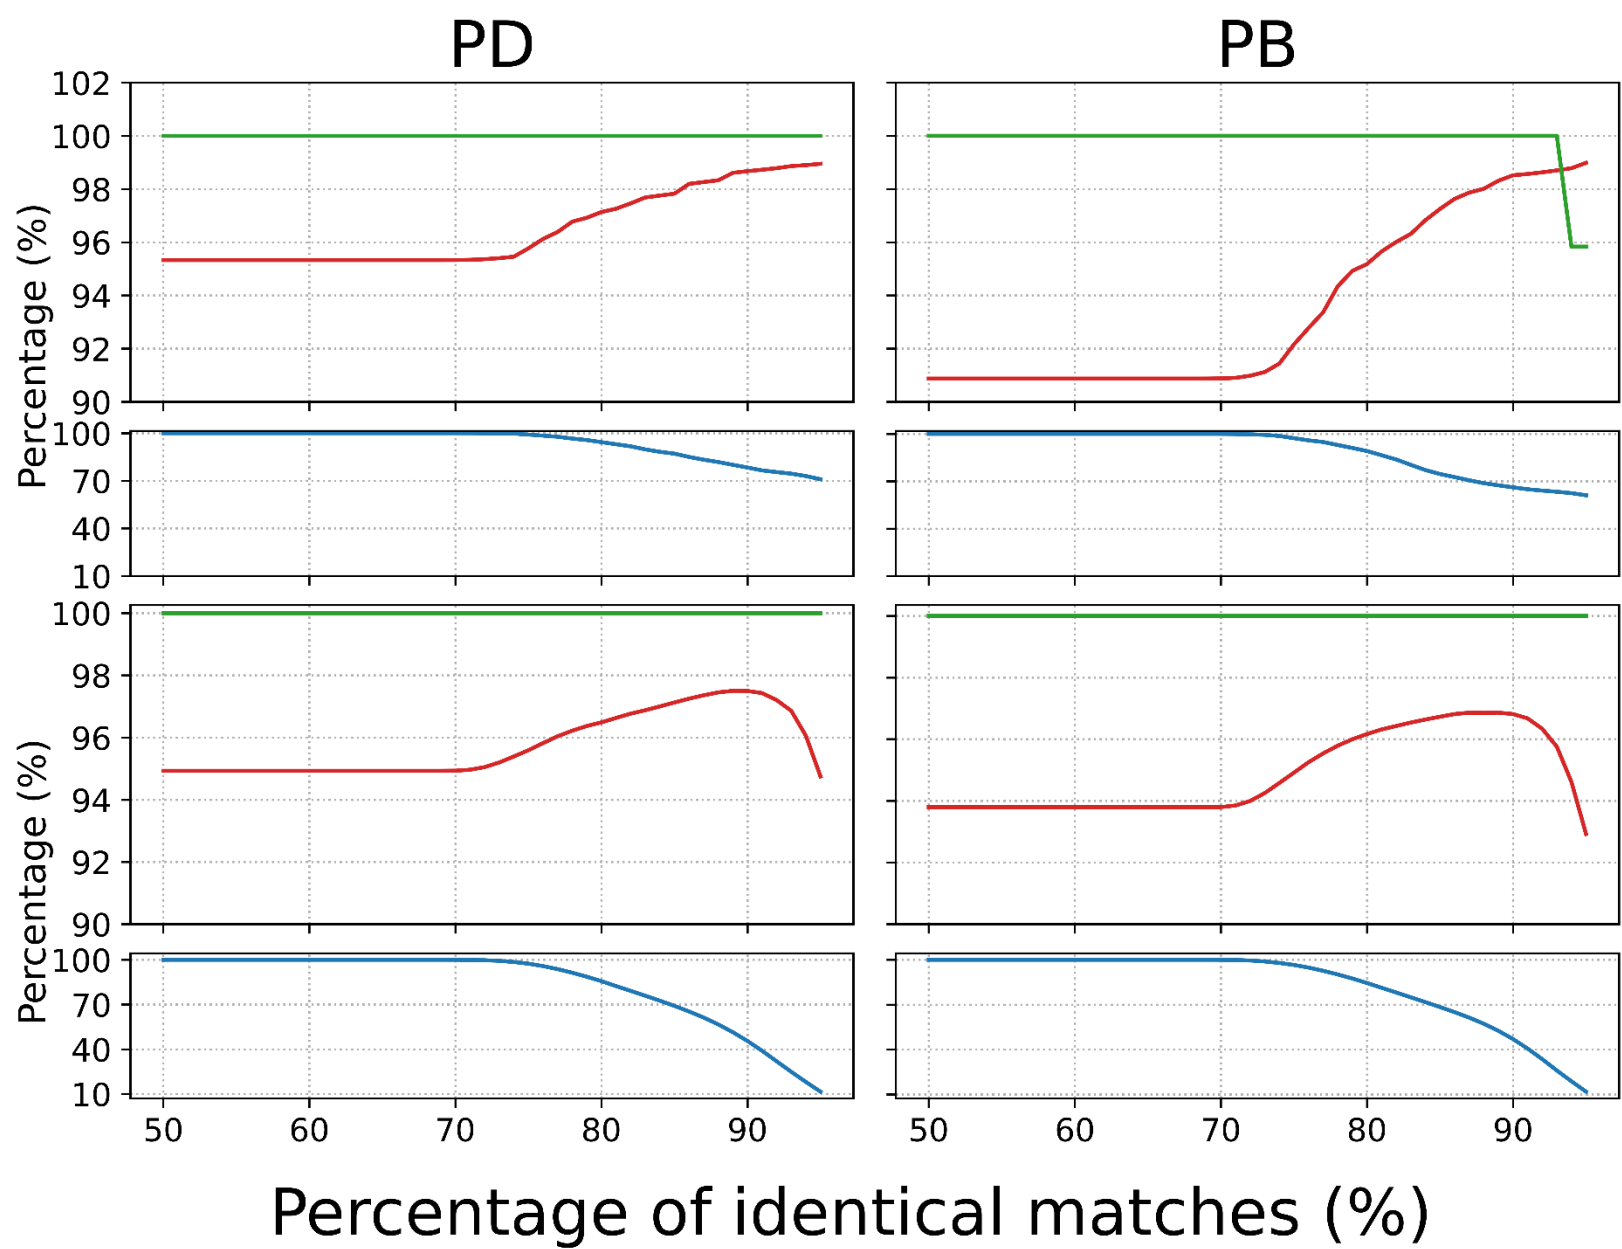**D**

Illumina

Nanopore

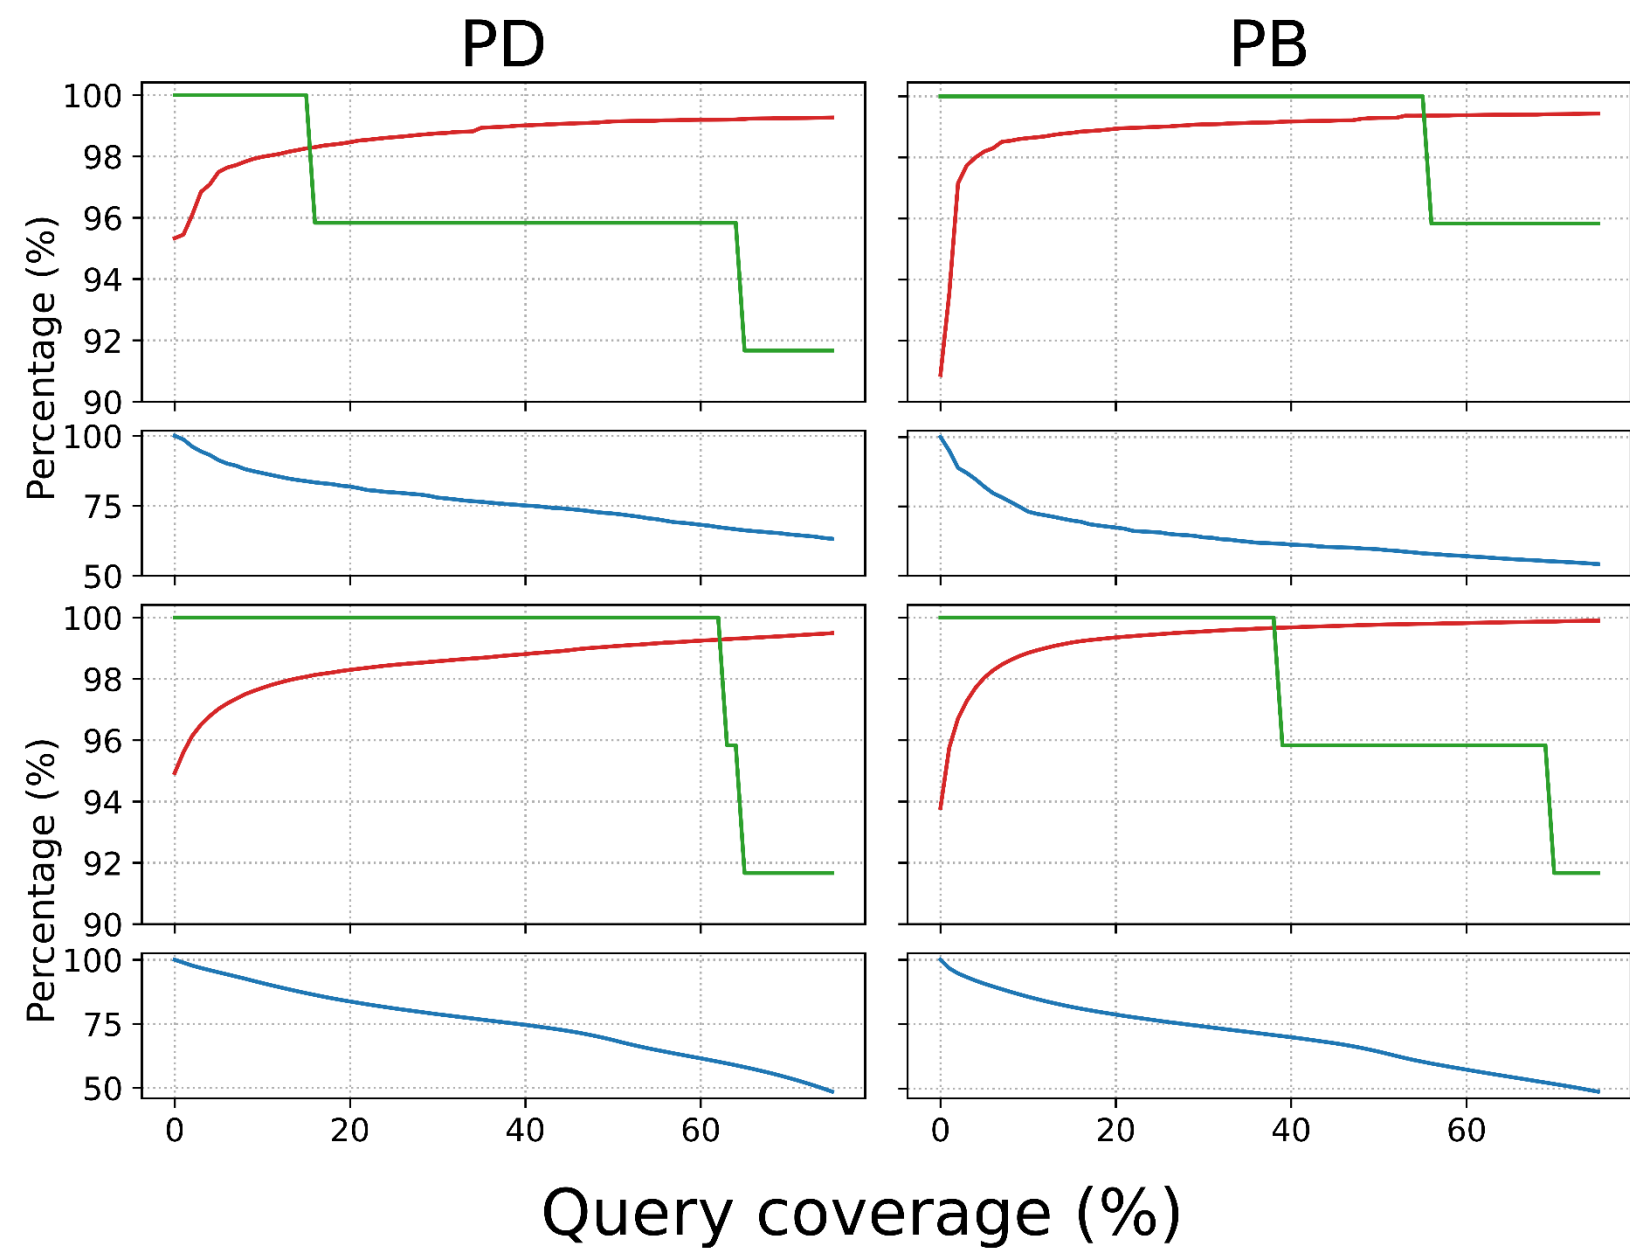

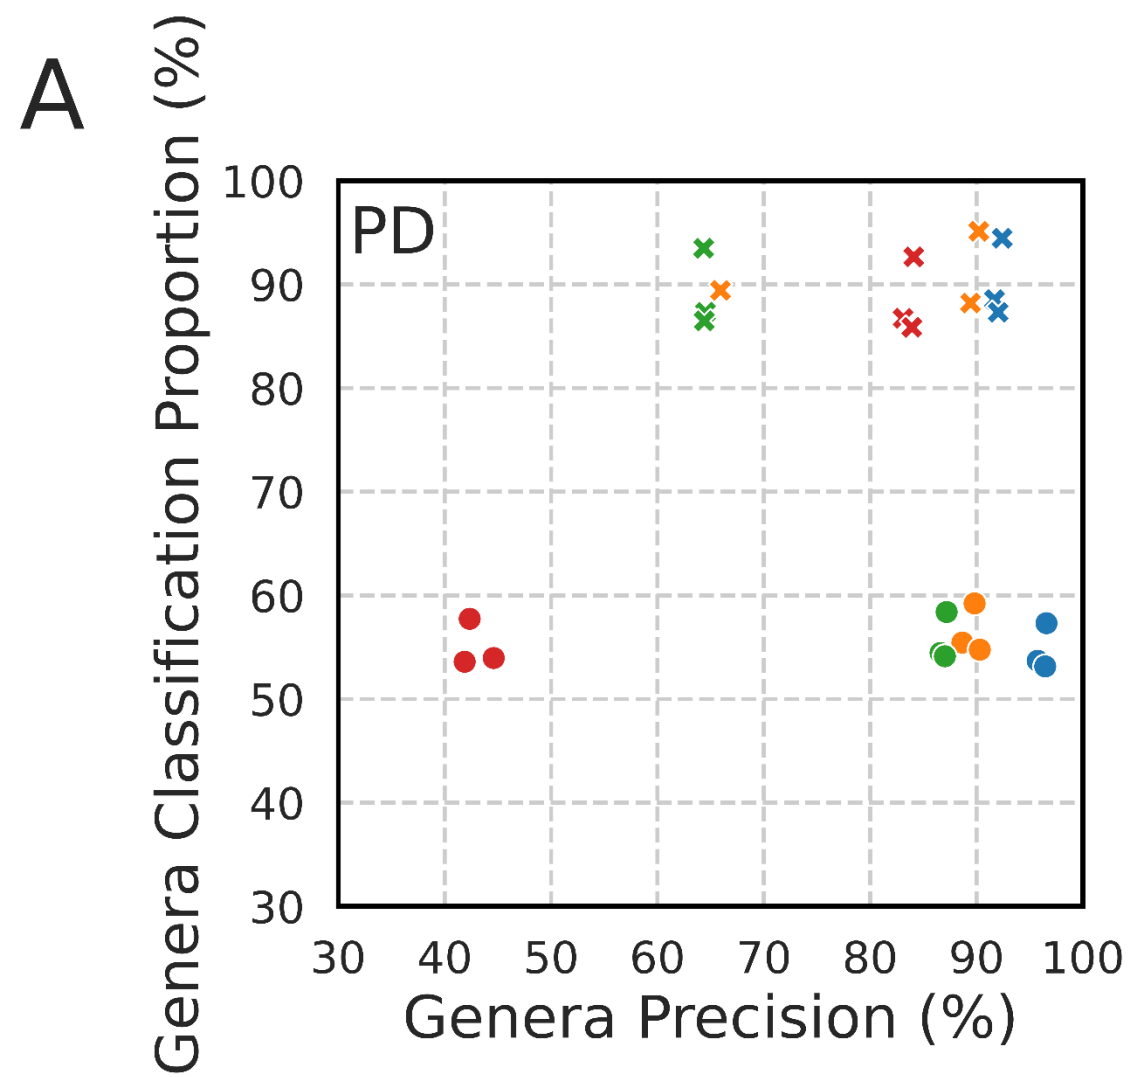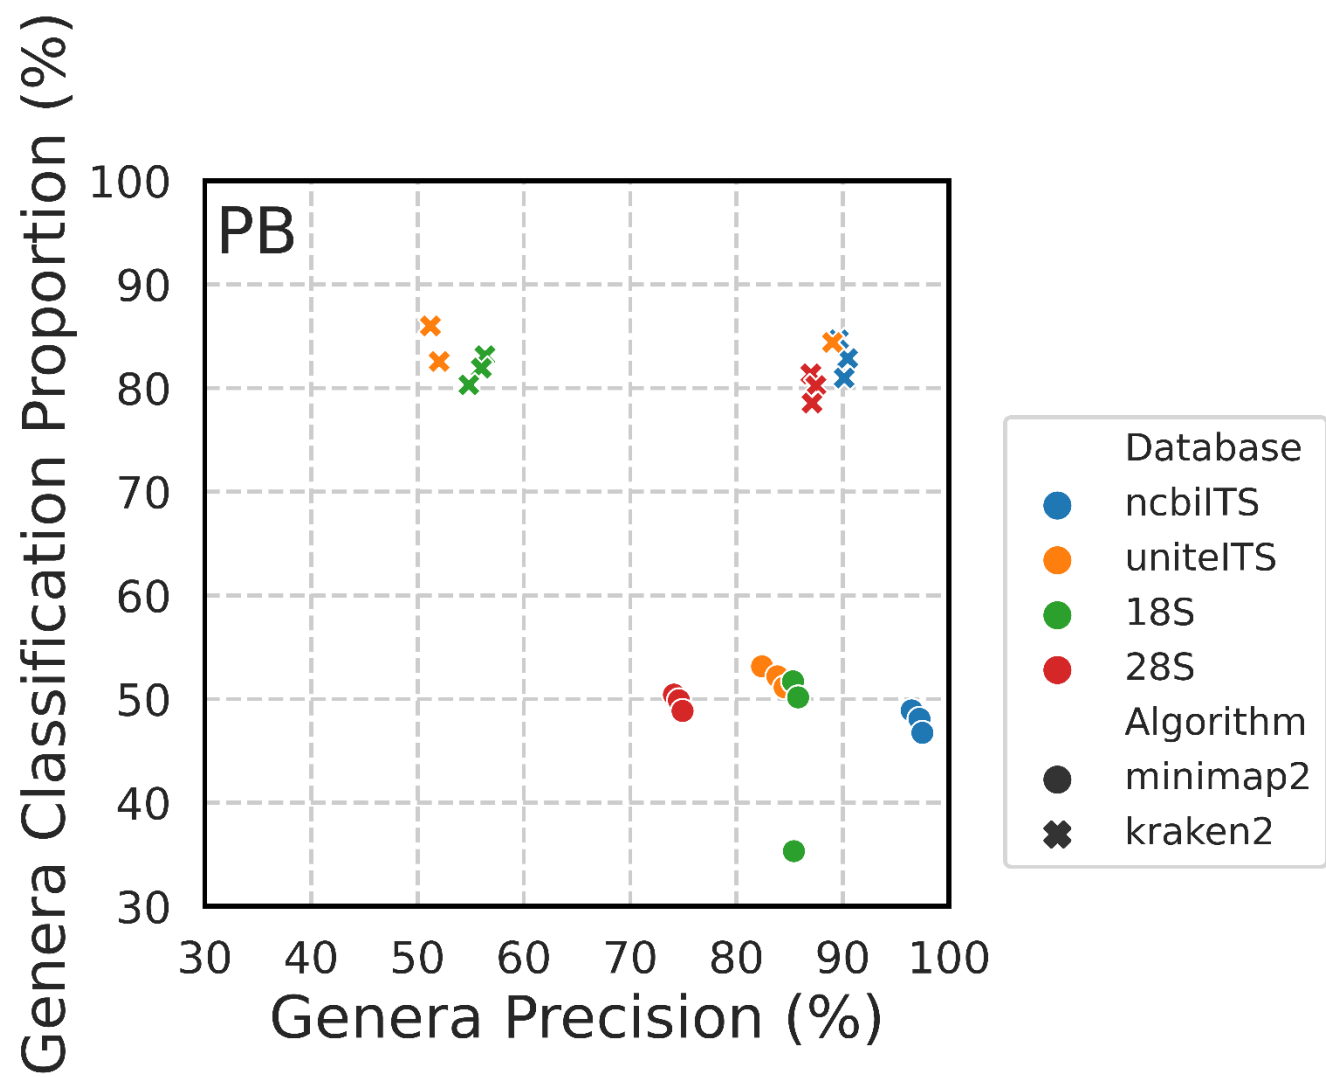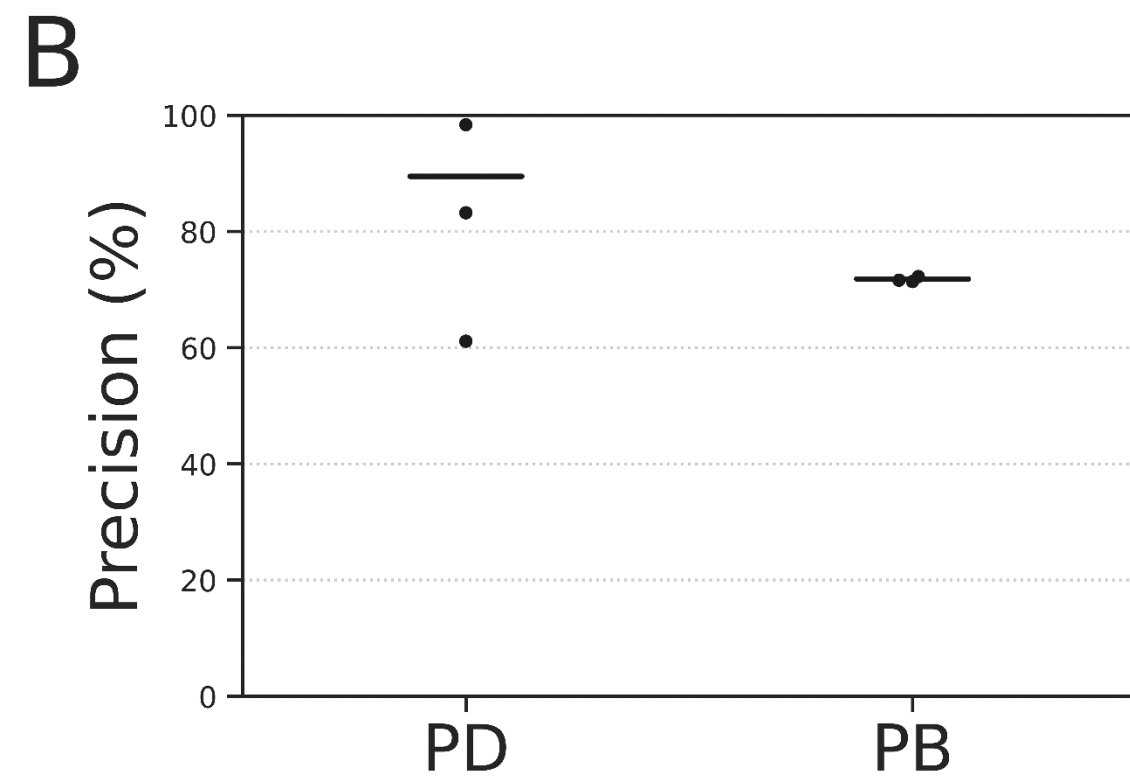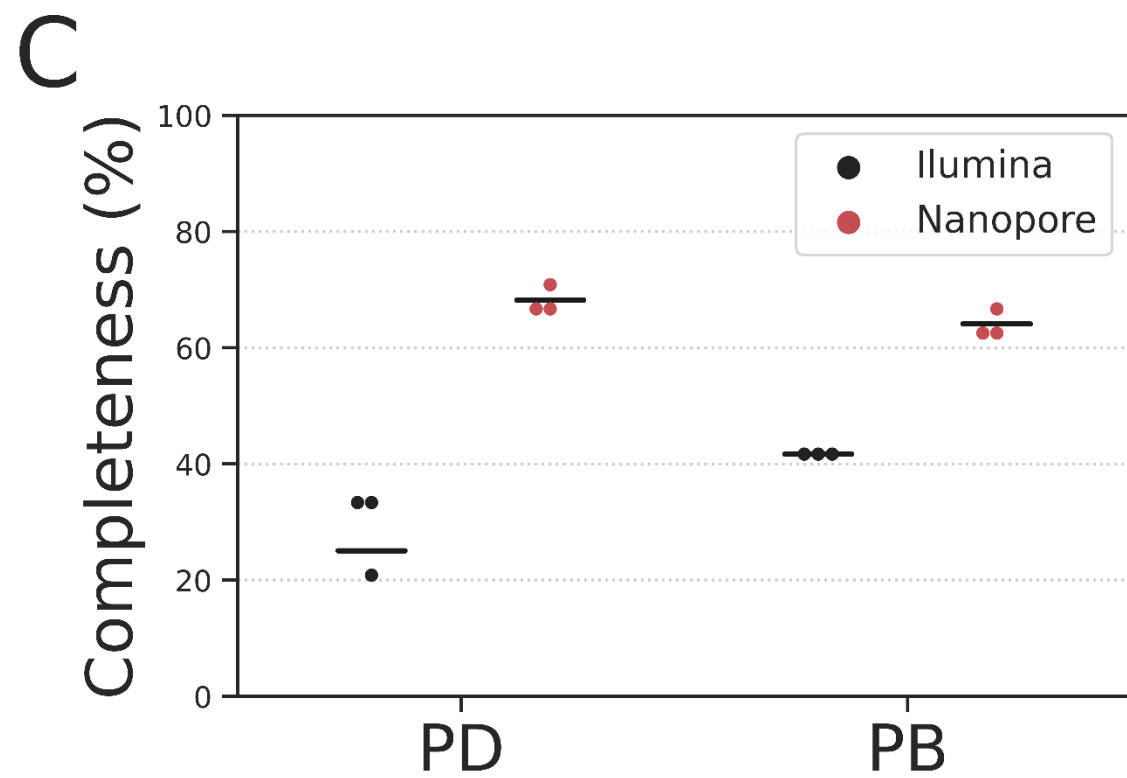

**A**

bioRxiv preprint doi: <https://doi.org/10.1101/2021.05.02.442318>; this version posted May 2, 2021. The copyright holder for this preprint (which was not certified by peer review) is the author/funder, who has granted bioRxiv a license to display the preprint in perpetuity. It is made available under aCC-BY-NC-ND 4.0 International license.

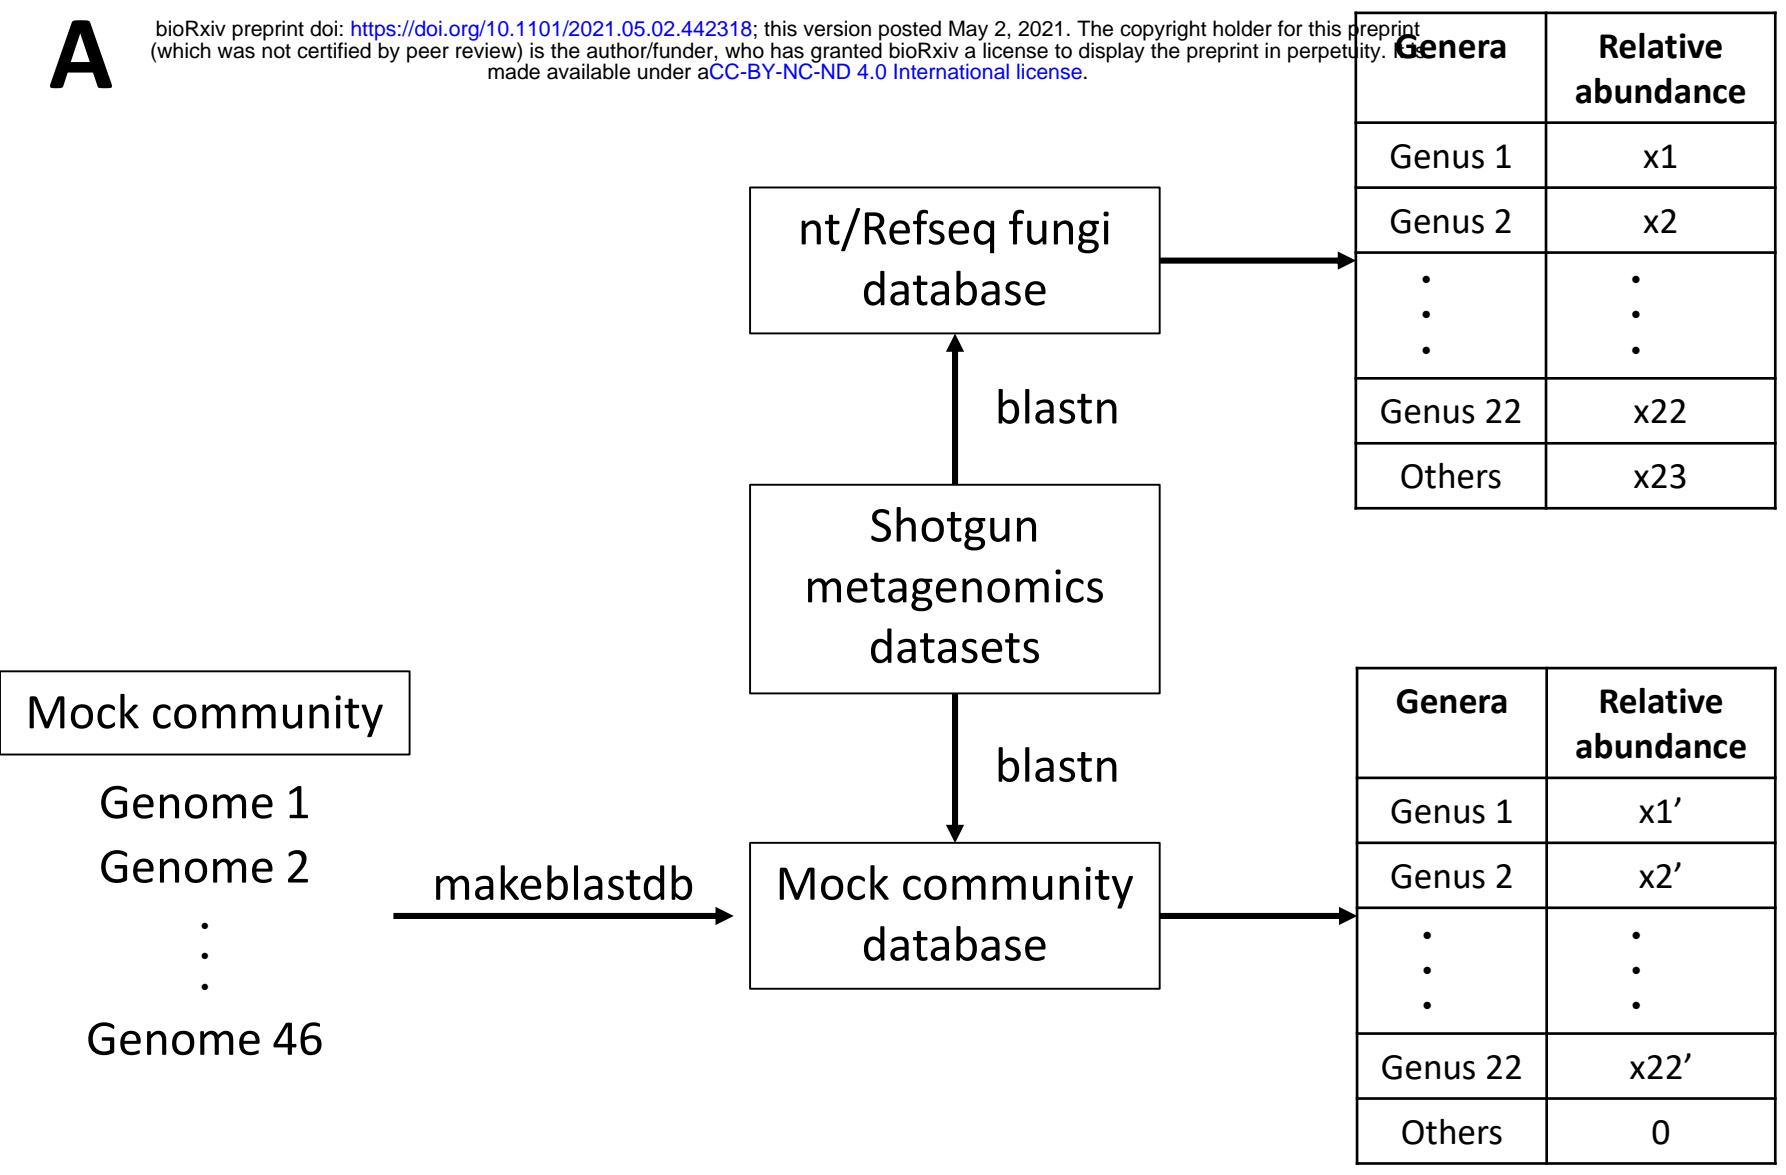

- Bhattacharyya distance
- Relative Euclidean distance
- KL divergence (Entropy)

- ◆ PD\_illumina
- ◇ PD\_nanopore
- PB\_illumina
- PB\_nanopore

- Classification
- blastn+RFD
- blastn+nt
- kraken2+RFD
- kraken2+nt
- Sequencing tech
- Illumina
- ✕ Nanopore

**C**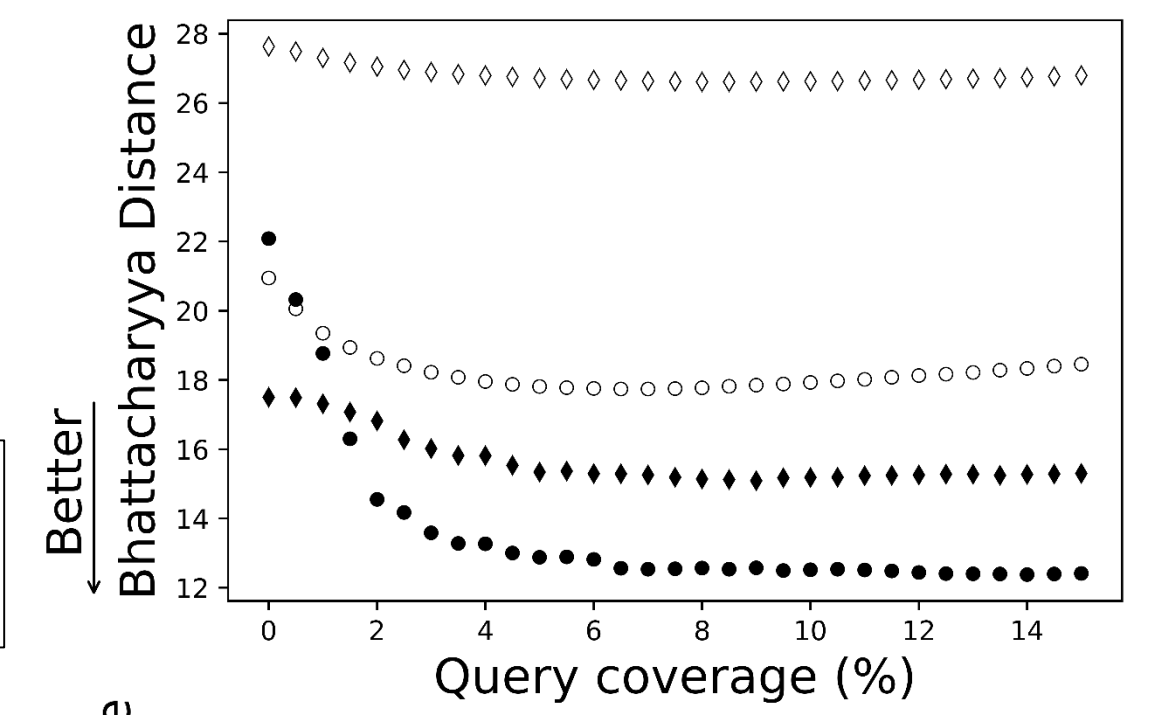**D**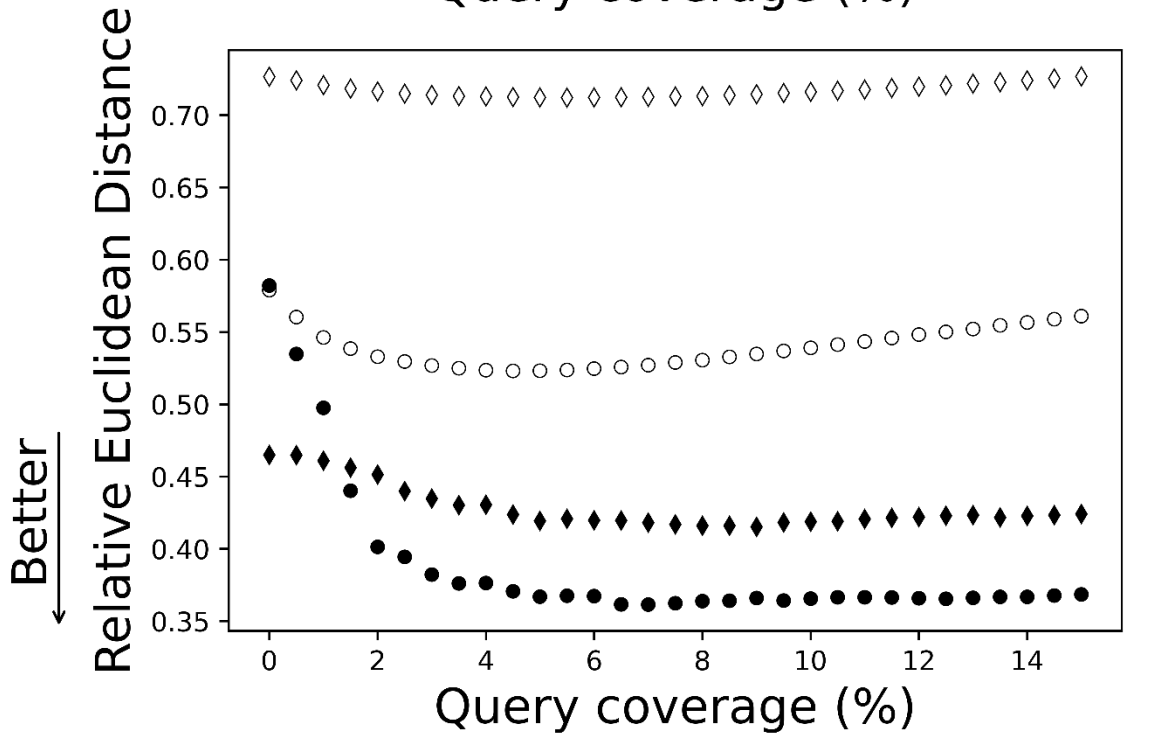**E**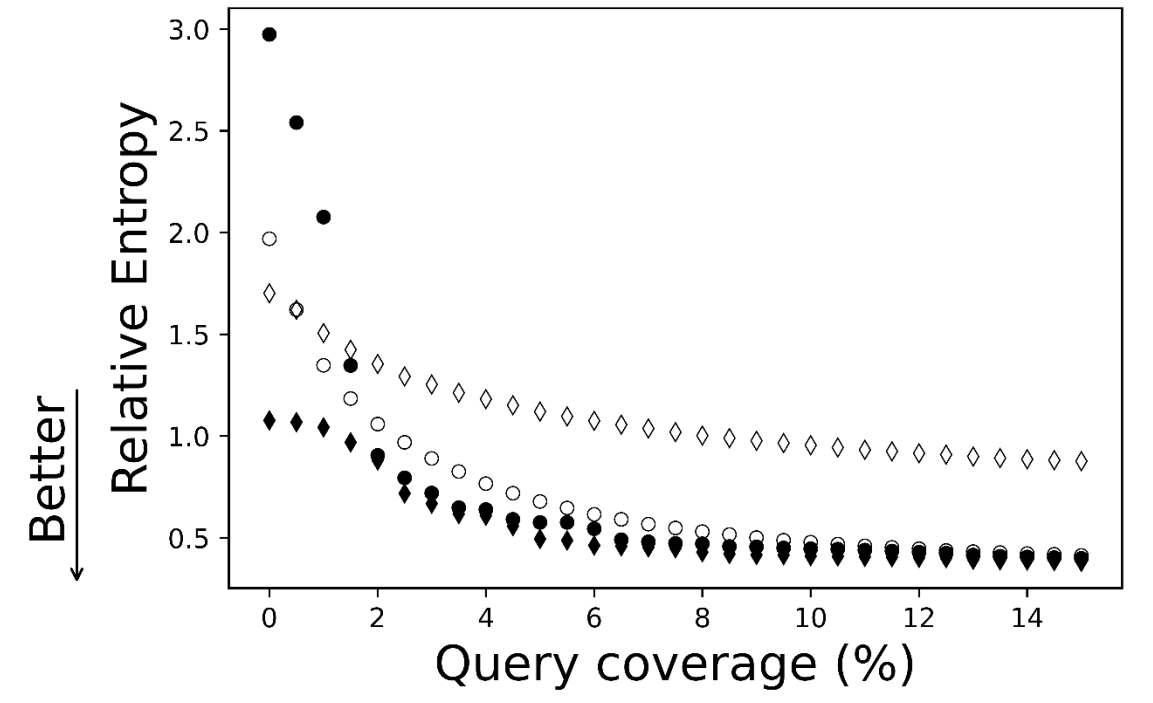**B**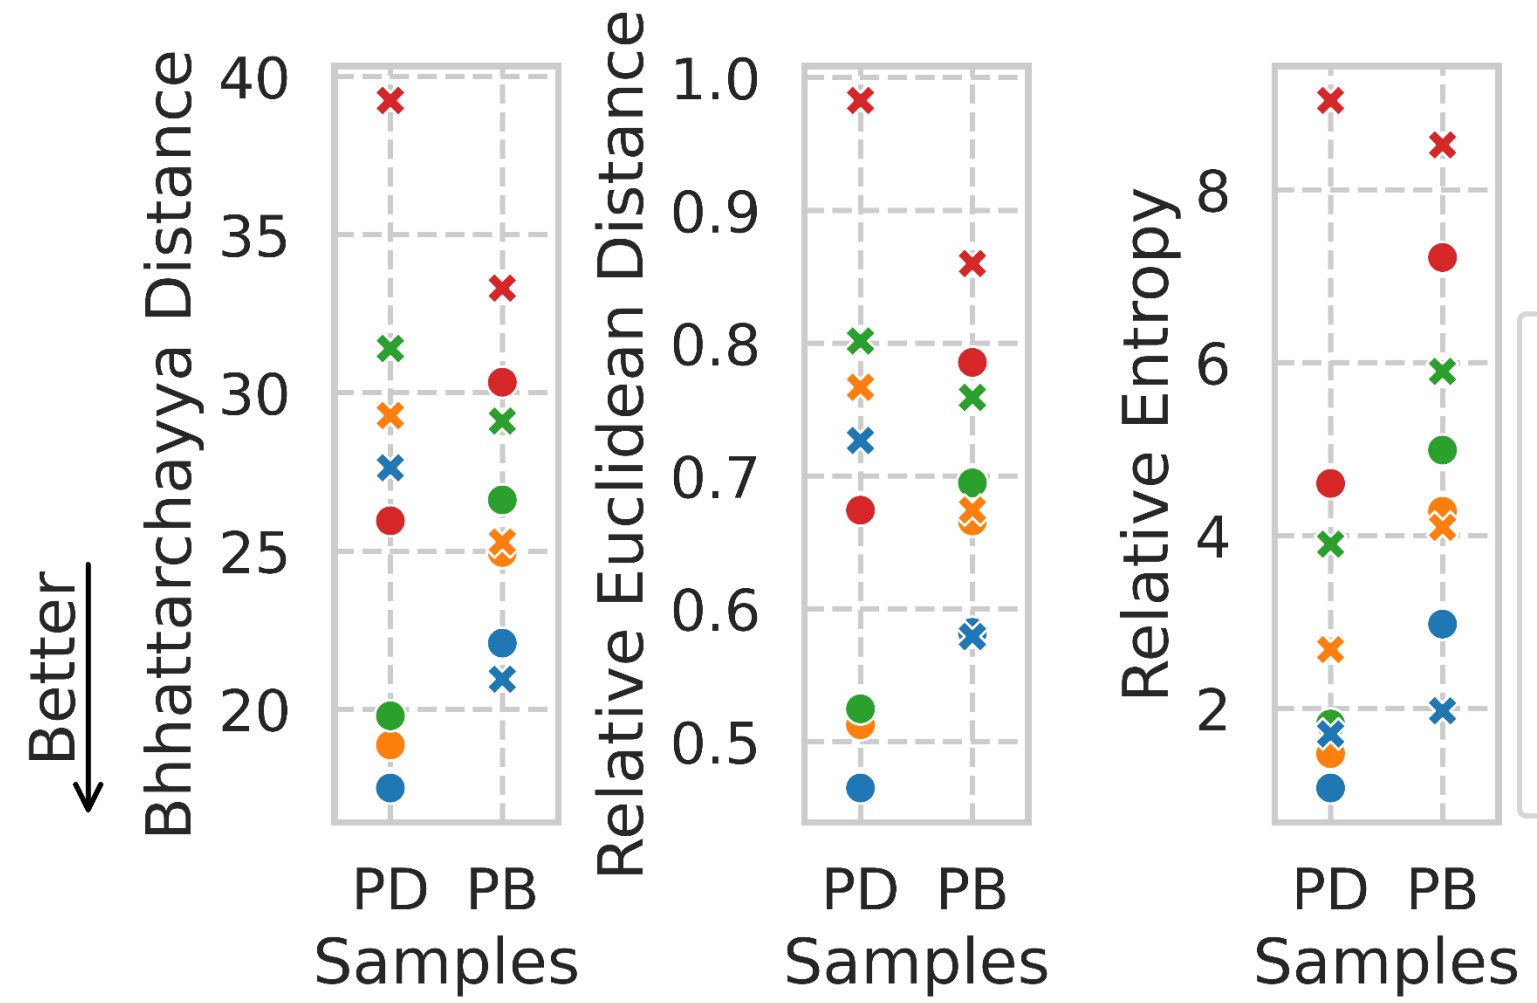

Source: https://www.biorxiv.org/content/10.1101/2021.05.02.442318v1.full.pdf
